# Supplementary material
Source: PubMed Central journal article supplement (PMC3976212)
Supplement: NIHMS565421-supplement-PeterDavidsonNature2011Suppl_.pdf [file NIHMS565421-supplement-PeterDavidsonNature2011Suppl_.pdf]

## Supplementary Tables

| Upstream  | Target           | Function   | Timepoint [h] |     | Domain        | Evidence <sup>a</sup> | Ref.         |
|-----------|------------------|------------|---------------|-----|---------------|-----------------------|--------------|
|           |                  |            | start         | end |               |                       |              |
| Blimp1    | <i>brn1/2/4</i>  | Activation | 27            |     | veg2 endoderm | MASO <sup>b</sup>     |              |
| Blimp1    | <i>krl</i>       | Repression | 27            |     | veg2 endoderm | MASO <sup>b</sup>     |              |
| Blimp1    | <i>otxb</i>      | Activation | 18            | 23  | veg2 endoderm | MASO,CR               | <sup>1</sup> |
| Blimp1    | <i>tgif</i>      | Activation | 24            |     | veg2 endoderm | MASO <sup>b</sup>     |              |
| Bra       | <i>foxa</i>      | Activation | 21            | 23  | veg2 endoderm | CR                    | <sup>2</sup> |
| Bra       | <i>hnf1</i>      | Activation | 24            |     | veg1 endoderm | MASO <sup>b</sup>     |              |
| Bra       | <i>otxb</i>      | Activation | 24            |     | veg1 endoderm | MASO <sup>b</sup>     |              |
| Bra       | <i>otxb</i>      | Activation | 19            | 23  | veg2 endoderm | MASO <sup>b</sup>     |              |
| Bra       | <i>tgif</i>      | Activation | 21            | 23  | veg2 endoderm | MASO <sup>b</sup>     |              |
| Bra       | <i>unc4.1</i>    | Activation | 24            |     | veg1 endoderm | MASO <sup>b</sup>     |              |
| Brn1/2/4  | <i>endo16</i>    | Activation | 27            |     | veg2 endoderm | MASO,CR               | <sup>3</sup> |
| Dac       | <i>dac</i>       | Repression | 27            |     | veg2 endoderm | MASO <sup>b</sup>     |              |
| Dac       | <i>hh</i>        | Activation | 27            |     | veg2 endoderm | MASO <sup>b</sup>     |              |
| Dac       | <i>krl</i>       | Repression | 27            |     | veg2 endoderm | MASO <sup>b</sup>     |              |
| Eve       | <i>hnf1</i>      | Activation | 24            |     | veg1 endoderm | MASO <sup>b</sup>     |              |
| Eve       | <i>hox11/13b</i> | Activation | 24            |     | veg1 endoderm | MASO <sup>b</sup>     |              |
| Eve       | <i>unc4.1</i>    | Activation | 24            |     | veg1 endoderm | MASO <sup>b</sup>     |              |
| FoxA      | <i>foxa</i>      | Repression | 20            | 24  | veg2 endoderm | CR                    | <sup>2</sup> |
| FoxA      | <i>gcm</i>       | Repression | 27            |     | veg2 endoderm | MASO                  | <sup>4</sup> |
| FoxA      | <i>hh</i>        | Activation | 24            |     | veg2 endoderm | MASO                  | <sup>4</sup> |
| FoxA      | <i>krl</i>       | Repression | 27            |     | veg2 endoderm | MASO <sup>b</sup>     |              |
| GataE     | <i>bra</i>       | Activation | 20            | 23  | veg2 endoderm | CR <sup>c</sup>       |              |
| GataE     | <i>brn1/2/4</i>  | Activation | 27            |     | veg2 endoderm | MASO <sup>b</sup>     |              |
| GataE     | <i>gatac</i>     | Repression | 27            |     | veg2          | MASO <sup>b</sup>     |              |
| GataE     | <i>krl</i>       | Repression | 24            |     | veg2 endoderm | MASO <sup>b</sup>     |              |
| GataE     | <i>otxb</i>      | Activation | 24            |     | veg2 endoderm | MASO <sup>b</sup> /CR | <sup>1</sup> |
| Hnf1      | <i>hnf1</i>      | Repression | 27            |     | veg1 endoderm | MASO <sup>b</sup>     |              |
| Hox11/13b | <i>blimp1b</i>   | Activation | 19            | 23  | veg2 endoderm | MASO <sup>b</sup>     |              |
| Hox11/13b | <i>bra</i>       | Activation | 24            |     | veg1 endoderm | MASO <sup>b</sup>     |              |
| Hox11/13b | <i>bra</i>       | Activation | 19            | 23  | veg2 endoderm | MASO <sup>b</sup>     |              |
| Hox11/13b | <i>foxa</i>      | Activation | 19            | 23  | veg2 endoderm | MASO <sup>b</sup> /CR | <sup>2</sup> |
| Hox11/13b | <i>gatae</i>     | Activation | 19            | 23  | veg2 endoderm | MASO <sup>b</sup>     |              |
| Hox11/13b | <i>hox11/13b</i> | Repression | 24            |     | veg2 endoderm | MASO <sup>b</sup>     |              |
| Krl       | <i>brn1/2/4</i>  | Activation | 27            |     | veg2 endoderm | MASO <sup>b</sup>     |              |
| Krl       | <i>hh</i>        | Activation | 27            |     | veg2 endoderm | MASO <sup>b</sup>     |              |
| Myc       | <i>hox11/13b</i> | Repression | 27            |     | veg2 endoderm | MASO <sup>b</sup>     |              |
| Myc       | <i>krl</i>       | Repression | 27            |     | veg2 endoderm | MASO <sup>b</sup>     |              |

|               |                  |            |    |    |               |                       |                |
|---------------|------------------|------------|----|----|---------------|-----------------------|----------------|
| Myc           | <i>myc</i>       | Repression | 24 |    | veg2 endoderm | MASO <sup>b</sup>     |                |
| Myc           | <i>tgif</i>      | Activation | 24 |    | veg2 endoderm | MASO <sup>b</sup>     |                |
| Otx           | <i>blimp1b</i>   | Activation | 19 |    | veg2 endoderm | CR                    | <sup>5</sup>   |
| Otx           | <i>bra</i>       | Activation | 19 | 23 | veg2 endoderm | CR <sup>c</sup>       |                |
| Otx           | <i>endo16</i>    | Activation | 24 |    | veg2 endoderm | MASO <sup>b</sup> /CR | <sup>6</sup>   |
| Otx           | <i>foxa</i>      | Activation | 24 |    | veg2 endoderm | MASO                  | <sup>2</sup>   |
| Otx           | <i>gatae</i>     | Activation |    |    | veg2 endoderm | CR <sup>d</sup>       |                |
| Otx           | <i>hh</i>        | Activation | 27 |    | veg2 endoderm | MASO <sup>b</sup>     |                |
| Otx           | <i>otx</i>       | Activation |    |    | veg2 endoderm | CR                    | <sup>1</sup>   |
| Otxa          | <i>brn1/2/4</i>  | Activation | 27 |    | veg2 endoderm | MASO <sup>b</sup>     |                |
| SoxC          | <i>soxc</i>      | Repression | 24 |    | veg2 endoderm | MASO <sup>b</sup>     |                |
| Tcf/β-catenin | <i>blimp1b</i>   | Activation | 19 |    | veg2 endoderm | CR                    | <sup>5,7</sup> |
| Tcf/β-catenin | <i>bra</i>       | Activation | 24 |    | veg1 endoderm | CR <sup>c</sup>       | <sup>7</sup>   |
| Tcf/β-catenin | <i>bra</i>       | Activation | 19 | 23 | veg2 endoderm | CR <sup>c</sup>       | <sup>7</sup>   |
| Tcf/β-catenin | <i>eve</i>       | Activation | 19 |    | veg1 endoderm | CR                    | <sup>5,7</sup> |
| Tcf/β-catenin | <i>foxa</i>      | Activation | 19 |    | veg2 endoderm | CR                    | <sup>2,7</sup> |
| Tcf/β-catenin | <i>hox11/13b</i> | Activation | 19 | 23 | veg2 endoderm | CR <sup>e</sup>       | <sup>7</sup>   |
| Tcf/β-catenin | <i>hox11/13b</i> | Activation | 24 |    | veg1 endoderm | CR <sup>e</sup>       | <sup>7</sup>   |
| Tcf/β-catenin | <i>krl</i>       | Activation | 19 |    | veg2 endoderm | LiCl                  | <sup>8</sup>   |
| Tcf/β-catenin | <i>wnt8</i>      | Activation | 19 |    | veg1 endoderm | CR                    | <sup>9</sup>   |
| Tgif          | <i>hh</i>        | Activation | 27 |    | veg2 endoderm | MASO <sup>b</sup>     |                |

<sup>a</sup> Experimental evidence for interaction; MASO: perturbation of upstream factor by injection of gene-specific morpholinos; CR: *cis*-regulatory analysis of target gene; LiCl: perturbation of Wnt signaling pathway by injection of LiCl

<sup>b</sup> present study

<sup>c</sup> R.A. Cameron and E.H. Davidson, unpublished results

<sup>d</sup> P.Y. Lee and E.H. Davidson, unpublished results

<sup>e</sup> C. Theodoris, J. Smith and E.H. Davidson, unpublished results

**Supplementary Table 1. Proposed direct interactions in endoderm GRNs [19-30 h].** For each transcription factor with specific expression in endodermal domains (“Upstream”), all likely direct target genes (“Target”) are listed along with the evidence supporting the regulatory interaction which causes activation or repression (“Function”) of the target gene. Data for interactions identified in the present study are shown in Supplementary Fig. 5 (marked in yellow). Proposed direct interactions are incorporated in the endoderm GRN models shown in Fig. 4.

| Upstream  | Target          | Function   | Time-point | Domain upstream factor | Domain target gene | Argument                                     |
|-----------|-----------------|------------|------------|------------------------|--------------------|----------------------------------------------|
| Blimp1    | <i>endo16</i>   | Activation | 24-27      | veg2 endod.            | veg2 endod.        | possibly indirect via Otx or Brn1/2/4        |
| Blimp1    | <i>foxa</i>     | Activation | 27         | veg2 endod.            | veg2 endod.        | possibly indirect via Otx                    |
| Blimp1    | <i>gatac</i>    | Activation | 24         | veg2 endod.            | veg2 mesod.        | not in same domain                           |
| Blimp1    | <i>blimp1b</i>  | Repression | 19-30      | veg2 endod.            | veg2 mesod.        | direct interaction in mesoderm               |
| Bra       | <i>foxg</i>     | Activation | 24-27      | Oral ectod.            | Oral ectod.        | proposed direct interaction in oral ectoderm |
| Bra       | <i>foxb</i>     | Activation | 24         | veg1 endod.            | skeletog. mesod.   | not in same domain                           |
| Bra       | <i>hh</i>       | Activation | 27         | veg1 endod.            | veg2 endod.        | possibly indirect via FoxA                   |
| Bra       | <i>krl</i>      | Repression | 27         | veg1 endod.            | veg2 endod.        | possibly indirect via FoxA                   |
| Dac       | <i>foxb</i>     | Activation | 24         | veg2 endod.            | skeletog. mesod.   | not in same domain                           |
| Dac       | <i>unc4.1</i>   | Activation | 24         | veg2 endod.            | veg1               | not in same domain                           |
| Eve       | <i>brn1/2/4</i> | Activation | 27         | veg1 endod.            | veg2 endod.        | possibly indirect via Blimp1                 |
| Eve       | <i>endo16</i>   | Activation | 27         | veg1 endod.            | veg2 endod.        | possibly indirect via Blimp1, Brn1/2/4       |
| Eve       | <i>gelsolin</i> | Activation | 24         | veg1 endod.            | veg2 endod.        | possibly indirect via Blimp1                 |
| Eve       | <i>hnf6</i>     | Activation | 27         | veg1                   | veg1               | possibly direct interaction in veg1 ectoderm |
| Eve       | <i>orCT</i>     | Activation | 24-27      | veg1 endod.            | veg2 endod.        | possibly indirect via Blimp1                 |
| Eve       | <i>tgif</i>     | Activation | 27         | veg1 endod.            | veg2 endod.        | possibly indirect via Blimp1                 |
| GataE     | <i>hh</i>       | Activation | 24-27      | veg2 endod.            | veg2 endod.        | possibly indirect via FoxA                   |
| Hox11/13b | <i>apobec</i>   | Activation | 24-27      | veg1 endod.            | veg2 endod.        | possibly indirect via Blimp1                 |
| Hox11/13b | <i>foxn2/3</i>  | Activation | 27         | veg1 endod.            | veg2 mesod.        | not in same domain                           |
| Hox11/13b | <i>hh</i>       | Activation | 27         | veg1 endod.            | veg2 endod.        | possibly indirect via FoxA                   |
| Hox11/13b | <i>hnf1</i>     | Activation | 24-27      | veg1 endod.            | veg1 endod.        | possibly indirect via Brachyury              |
| Hox11/13b | <i>orCT</i>     | Activation | 27         | veg1 endod.            | veg2 endod.        | possibly indirect via Blimp1                 |
| Hox11/13b | <i>tgif</i>     | Activation | 24-27      | veg1 endod.            | veg2 endod.        | possibly indirect via Blimp1 or Brachyury    |

|       |               |            |       |                |                |                                             |
|-------|---------------|------------|-------|----------------|----------------|---------------------------------------------|
| Myc   | <i>hh</i>     | Activation | 27    |                | veg2<br>endod. | possibly indirect via Tgif                  |
| Notch | <i>apobec</i> | Repression | 24    | veg2<br>mesod. | veg2<br>endod. | indirect repression probably<br>in mesoderm |
| Notch | <i>gatac</i>  | Activation | 24-27 | veg2<br>mesod. | veg2<br>mesod. | proposed direct interaction in<br>mesoderm  |
| Notch | <i>gcm</i>    | Activation | 24-27 | veg2<br>mesod. | veg2<br>mesod. | direct interaction in<br>mesoderm           |
| Otx   | <i>foxg</i>   | Activation | 24-27 | several        | ectoderm       | proposed direct interaction in<br>ectoderm  |

**Supplementary Table 2. Arguments for not including significant perturbation effects in endoderm GRN model.** Incorporated in this list are all genes (“Target”) showing significant changes of expression upon perturbation of a regulatory gene (“Upstream”) which are unlikely to be the consequence of direct regulatory interactions for reasons stated (“Argument”). Data are shown in Supplementary Fig. 5 (marked in orange). Briefly, direct regulatory interactions require the co-expression of upstream factor and target gene and are only predicted if no other (e.g. indirect) regulatory interactions explain the observed effects.

| Upstream  | Target           | Function   | Time | Signal Origin | Signal Target    | Predicted Signal |
|-----------|------------------|------------|------|---------------|------------------|------------------|
| Eve       | <i>blimp1b</i>   | Activation | >24  | veg1          | veg2<br>endoderm | Signal V2        |
| Eve       | <i>gatae</i>     | Activation | >27  | veg1          | veg2<br>endoderm | Signal V2        |
| Hox11/13b | <i>hox11/13b</i> | Activation | >24  | veg2          | veg1<br>endoderm | Signal V1        |

**Supplementary Table 3. Proposed interactions involving signaling between two adjacent domains.** Target genes which are significantly affected by a given perturbation (“Upstream”) but are expressed in cells adjacent to the upstream factor might be regulated by a signaling interaction. The corresponding signaling ligand is predicted to be expressed in one domain (“Signal Origin”) under the control of the upstream regulatory factor and to affect target gene expression in the adjacent domain (“Signal Target”). Data are shown in Supplementary Fig. 5 (marked in green).

| Gene             | Gene identifier | primer seq (Forward)    | primer seq (Reverse)    |
|------------------|-----------------|-------------------------|-------------------------|
| <i>alx1</i>      | SPU_025302      | CAGTGCAGCTTTACGTGGAC    | TTAAGTCTCGGCACGACAAA    |
| <i>apobec</i>    | SPU_011837      | ACCCAGTTTCACCCTCCTCT    | AGGCACTCAGCTGCAAAGTT    |
| <i>blimp1b</i>   | SPU_027235      | TCGCTATGCGGGATCTCTAC    | GGGGTCTTGACCTCGTAA      |
| <i>bra</i>       | SPU_013015      | ACACATCGACCCATCATCAA    | CATGGTGTGCTATCTTGGAAAG  |
| <i>bra2</i>      | SPU_013015      | CGCCGTACAGTCAGAGATGA    | AAGTCGAGCAGGACGGAGTA    |
| <i>brn1/2/4</i>  | SPU_016443      | GTCGCATTAAGCTCGGCTAC    | CAGCGGCTTCAGTTTACACA    |
| <i>dac</i>       | SPU_028061      | GGATGCGAACCTGTTCTACG    | CAATTCAAAGCTTGTGGCA     |
| <i>delta</i>     | SPU_016128      | ACGGAGCTACATGCCTGAAC    | TCACAATGGACCGAATCAGA    |
| <i>elk</i>       | SPU_012469      | ATCATGGTCGCTAGTCTCTCTCT | TGACAAGAGAACAGTCGGTGTGA |
| <i>endo16</i>    | SPU_011038      | GACCGAACGCCGATATAAGA    | GCCATCGTCCCTTTAGTTCA    |
| <i>eve</i>       | SPU_012253      | CACAGACCCTGGACTTTCGT    | GACAAACGGTCAATCCACTT    |
| <i>foxa</i>      | SPU_006676      | CCAACCGACTCCGTATCATC    | CGTAGCTGCTCATGCTGTGT    |
| <i>foxb</i>      | SPU_004551      | AAGCCATCCACAACCAAATC    | CATATCCGTGCAACGAGTCA    |
| <i>foxg</i>      | SPU_009771      | CGCTCGAGTCCAGAGAAAAG    | TGTCGAGGGACTTTCACAAA    |
| <i>foxn2/3</i>   | SPU_015243      | TTCATGTGCTAGAGGACTGC    | TTCGGAAGCACTTGTGAGA     |
| <i>foxp</i>      | SPU_009876      | TGTGGCAGCATTTCTTCTGA    | TACGTATGCTGCCCTCATCA    |
| <i>gatac</i>     | SPU_027015      | CAGGGACATCATGTGCAAAC    | CCGTGTTTGAATGCCTTCTT    |
| <i>gatae</i>     | SPU_010635      | CTGGCTCAAGACGAGAAGGA    | CCTCTTCCGAGTCTGAATGC    |
| <i>gcm</i>       | SPU_006462      | CGACTGATAACCACGCTCAA    | TTAACGACGTGGTTCGATTC    |
| <i>gelsolin</i>  | SPU_020607      | CTCCATCGACGAGAGAGAA     | CCTTCTGCTACGACCGAAAC    |
| <i>hh</i>        | SPU_021608      | GGCTTCGATTGGGTCAACTA    | GTGACCACGGCTACCTCAT     |
| <i>hesc</i>      | SPU_012238      | CCAGAACAGGGCGAATCTAA    | CGAAGACGGGTTTCAATGTC    |
| <i>hnf1</i>      | SPU_008196      | CGTGCCCTTATTCAAATGCT    | CCATGGCAAGTAGCGAAGAT    |
| <i>hnf6</i>      | SPU_016449      | TGCAGCTTCTCTGCATACCA    | ACTCCAACATGCCTCCAAAC    |
| <i>hox11/13b</i> | SPU_002631      | CACAGGCTCTCGACCTAACC    | GGTGGATGAGGTGGTAGATGA   |
| <i>kakapo</i>    | SPU_003256      | GTGGCATTATGAGCGGTCT     | CGGCCAGTACTTCAAGGAGA    |
| <i>krl</i>       | SPU_004148      | CACGAACTCTTCGCAATCAA    | CCAAGGGACAGGAGTGAAGA    |
| <i>msx</i>       | SPU_022049      | AGCACAAGACAAACCGGAAG    | CGTTCGGCTATCGAGAGGTA    |
| <i>myc</i>       | SPU_003166      | CCCGCCATCCTCACATAAT     | GGAACAGCGCTTACCCTT      |
| <i>notch</i>     | SPU_014131      | ACGGAGCCAAGCCTAAGAA     | TCGTACAGGCAACGAATAA     |
| <i>orct</i>      | SPU_012646      | GACTTCAGACCGCTTGGTCT    | TTATCACTGTGCGGGAGTTTG   |
| <i>otx-alpha</i> | SPU_010424      | CCTTACCAGACCTGATCG      | CTGGTCTGCTGAACAAGGT     |
| <i>otxb</i>      | SPU_010424      | GTTTAGGAACGTCGCTGGAA    | TGAAGGTGGTGGTGTGTTG     |
| <i>soxb1</i>     | SPU_022820      | ATTCTGTGAACGTGATGGCA    | TTGTCTCTTGACCACACCA     |
| <i>soxc</i>      | SPU_002603      | CATGGTTTGGTCACAAATCG    | TACGGAGATTTCCGCCACTTC   |
| <i>tgif</i>      | SPU_018126      | GCTCTACCTATCTCGCTTGGC   | TGGTGAACCTTGTGAGGCTCT   |
| <i>ubq</i>       | SPU_021496      | CACAGGCAAGACCATCACAC    | GAGAGAGTGCACCATCCTC     |
| <i>unc4.1</i>    | SPU_013704      | TGAACACGTGACTCAACAAGG   | CAATGGTTGGCAGCTGGAG     |
| <i>wnt8</i>      | SPU_020371      | TGTCGTTTCAATCAAGCCATC   | TATCACTCGCCATTCGTTCA    |
| <i>z188</i>      | SPU_023727      | GGCATGCTAAGTCCATCGT     | GCTCTTTGTTCAATGGTGGCT   |

Supplementary Table 4. QPCR primers used in perturbation experiments

| Gene             | MASO sequence             | MASO interfering with     |
|------------------|---------------------------|---------------------------|
| <i>blimp1b</i>   | CTCCCTTTCGCTTGAAAAACACCGC | Translation <sup>10</sup> |
| <i>bra</i>       | CGCTCATTGCAGGCATAGTGGCG   | Translation               |
| <i>dac</i>       | CCTGAGTAGGCGGTGGGCTTCCCAT | Translation               |
| <i>eve</i>       | CAGAAACCACTCGATCAATGTTTGC | Translation               |
| <i>foxa</i>      | TGGGTTCTCTTTGAAATCCACGAT  | Translation <sup>4</sup>  |
| <i>gatae</i>     | GACTTACACCGACCTGATGTGGCAT | Translation               |
| <i>hnf1</i>      | CTAGTTCGTCAACCGAATGCAGCAT | Translation               |
| <i>hox11/13b</i> | AAGCCTGTTCATGCCGATCTGCAT  | Translation <sup>11</sup> |
| <i>krl</i>       | CGCCCGTGTAGACGGTTCATGTCCG | Translation <sup>8</sup>  |
| <i>myc</i>       | ACTGCCAGTGCCATTTTGCAGGTGA | Translation               |
| <i>notch</i>     | CCTGGATGGGTAGTCCGCCTCATCT | Translation               |
| <i>otx HD</i>    | TGGATCTAGACAGAGGAGGAGAAAC | Splicing                  |
| <i>otx-alpha</i> | CATGTACCACTGCTTGACCGGTGCT | Translation               |
| <i>soxc</i>      | GAACCATCTTGAAGTCAGCATTCAC | Translation <sup>12</sup> |
| <i>tgif</i>      | ATCTTTCTTGTGGTAAATCCGCATC | Translation <sup>12</sup> |

**Supplementary Table 5. Morpholino antisense oligonucleotide (MASO) sequences.** For evidence of morpholino activity and specificity see Supplementary Fig. 5

| Gene             | WMISH probe source      | Sequence origin              | Sequence fragment [bp]             | WMISH primer fwd             | WMISH primer rev             |
|------------------|-------------------------|------------------------------|------------------------------------|------------------------------|------------------------------|
| <i>blimp1b</i>   | PCR <sup>13</sup>       | DQ177152.1                   | 765-1398                           | AGAGAAACCAGTTGTGCGGT         | ATCTTGCTTCATGCTGGCTT         |
| <i>bra</i>       |                         |                              | 600bp cDNA                         |                              |                              |
| <i>dac</i>       | cDNA clone <sup>a</sup> | GLEAN3_28061                 | 1-398                              |                              |                              |
|                  |                         | GLEAN3_18581                 | 43-384; 429-491                    |                              |                              |
| <i>eve</i>       | cDNA clone <sup>7</sup> | GLEAN3_12253                 | 57-756                             |                              |                              |
| <i>foxa</i>      | <sup>4</sup>            |                              | 1659 bp cDNA                       |                              |                              |
| <i>gcm</i>       | <sup>7</sup>            |                              |                                    |                              |                              |
| <i>hnf1</i>      | PCR                     | XM_001179097.1               | 436-1426                           | GCCGTTACAACCTCACCTGT         | TAGCATGCCCGATAAGATCC         |
| <i>hox11/13b</i> | PCR                     | GLEAN3_02631<br>CDS Sequence | 380-1001                           | GCCCTACGCCAATACATTC          | TGACCAACTGAGGGATGTGA         |
| <i>krl</i>       | PCR                     | AF314167                     | 1-1216 plus 60bp<br>3'UTR sequence | ATTCTGAACATTTGTCTTCTCTAGAGCA | TATAGCAAAGGTTTTAACGTCAATAACC |
| <i>myc</i>       | PCR                     | NM_214579.2                  | 6-1515                             | GCCTTGTCAAACTCTAATCGG        | GTGGTCCAAATCCAATACGC         |
| <i>soxc</i>      | <sup>12</sup>           |                              |                                    |                              |                              |
| <i>tgif</i>      | <sup>12</sup>           |                              |                                    |                              |                              |
| <i>wnt8</i>      | <sup>9</sup>            |                              |                                    |                              |                              |

<sup>a</sup> see Supplementary Fig. 8

**Supplementary Table 6. cDNA fragment sequences used to generate probes for whole mount in situ hybridizations (WMISH).** Primer sequences, where given, were used to amplify probe templates from cDNA, which was generated from total RNA (extracted from 27h embryos). Indicated sequence positions (“sequence fragments”) refer to the sequences given in “Sequence origin”. Sequences for GLEAN models to be found on SpBase (<http://www.spbase.org>).



## Supplementary Information References

- 1 Yuh, C. H., Dorman, E. R., Howard, M. L. & Davidson, E. H. An *otx* cis-regulatory module: a key node in the sea urchin endomesoderm gene regulatory network. *Dev. Biol.* **269**, 536-551 (2004).
- 2 Ben-Tabou de-Leon, S. B. & Davidson, E. H. Information processing at the *foxa* node of the sea urchin endomesoderm specification network. *Proc. Natl Acad. Sci. USA* **107**, 10103-10108 (2010).
- 3 Yuh, C. H., Dorman, E. R. & Davidson, E. H. *Brn1/2/4*, the predicted midgut regulator of the *endo16* gene of the sea urchin embryo. *Dev. Biol.* **281**, 286-298 (2005).
- 4 Oliveri, P., Walton, K. D., Davidson, E. H. & McClay, D. R. Repression of mesodermal fate by *foxa*, a key endoderm regulator of the sea urchin embryo. *Development* **133**, 4173-4181 (2006).
- 5 Smith, J., Kraemer, E., Liu, H., Theodoris, C. & Davidson, E. A spatially dynamic cohort of regulatory genes in the endomesodermal gene network of the sea urchin embryo. *Dev. Biol.* **313**, 863-875 (2008).
- 6 Yuh, C. H., Bolouri, H. & Davidson, E. H. Genomic cis-regulatory logic: experimental and computational analysis of a sea urchin gene. *Science* **279**, 1896-1902 (1998).
- 7 Ransick, A., Rast, J. P., Minokawa, T., Calestani, C. & Davidson, E. H. New early zygotic regulators expressed in endomesoderm of sea urchin embryos discovered by differential array hybridization. *Dev. Biol.* **246**, 132-147 (2002).
- 8 Howard, E. W., Newman, L. A., Oleksyn, D. W., Angerer, R. C. & Angerer, L. M. *SpKrl*: a direct target of beta-catenin regulation required for endoderm differentiation in sea urchin embryos. *Development* **128**, 365-375 (2001).
- 9 Minokawa, T., Wikramanayake, A. H. & Davidson, E. H. cis-Regulatory inputs of the *wnt8* gene in the sea urchin endomesoderm network. *Dev. Biol.* **288**, 545-558 (2005).
- 10 Livi, C. B. & Davidson, E. H. Expression and function of *blimp1/krox*, an alternatively transcribed regulatory gene of the sea urchin endomesoderm network. *Dev. Biol.* **293**, 513-525 (2006).
- 11 Arenas-Mena, C., Cameron, R. A. & Davidson, E. H. Hindgut specification and cell-adhesion functions of *Sphox11/13b* in the endoderm of the sea urchin embryo. *Dev. Growth Differ.* **48**, 463-472 (2006).
- 12 Oliveri, P., Tu, Q. & Davidson, E. H. Global regulatory logic for specification of an embryonic cell lineage. *Proc. Natl Acad. Sci. USA* **105**, 5955-5962 (2008).
- 13 Rast, J. P., Cameron, R. A., Poustka, A. J. & Davidson, E. H. *brachyury* Target genes in the early sea urchin embryo isolated by differential macroarray screening. *Dev. Biol.* **246**, 191-208 (2002).
- 14 Peter, I. S. & Davidson, E. H. The endoderm gene regulatory network in sea urchin embryos up to mid-blastula stage. *Dev. Biol.* **340**, 188-199 (2010).
- 15 Smith, J., Theodoris, C. & Davidson, E. H. A gene regulatory network subcircuit drives a dynamic pattern of gene expression. *Science* **318**, 794-797 (2007).

## Supplementary Figures

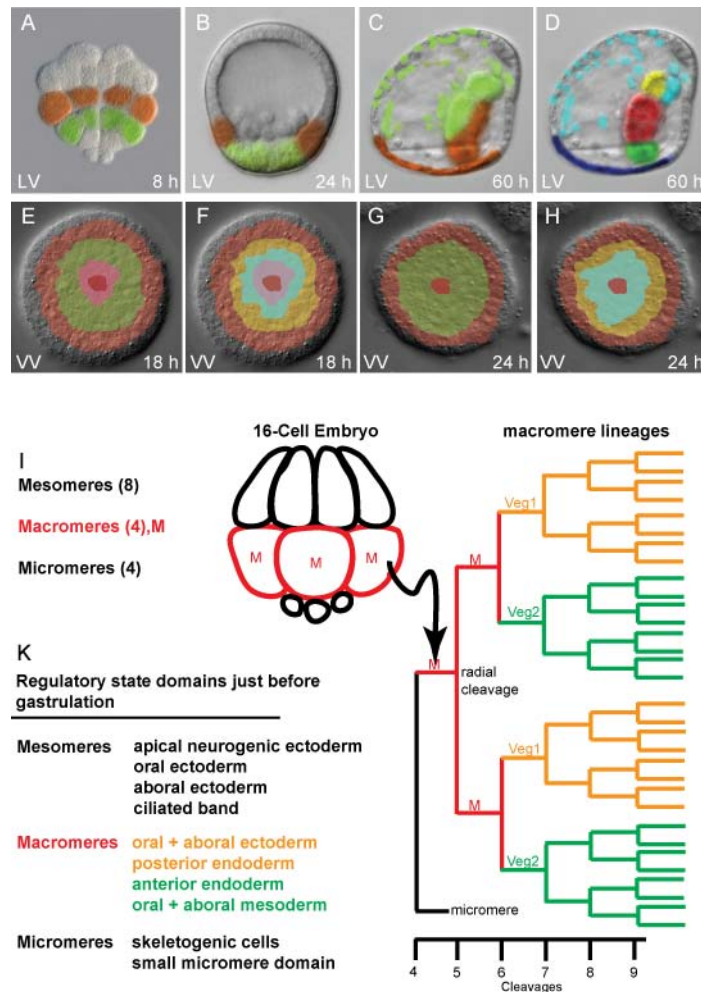**Supplementary Figure 1. Veg1 and veg2 lineages and cell fates in the sea urchin embryo.**

(a-c), Veg1 (orange) and veg2 (green) lineages, displayed in color superimposed on lateral DIC images of *Strongylocentrotus purpuratus* embryos. (a), At 6th cleavage (8h), two rings of 8 cells each, here shown highlighted in color, are formed by a horizontal cleavage, thus founding the veg1 and veg2 lineages. The endoderm of the later embryo derives entirely from these lineages. Four cells of each lineage can be seen in the lateral view shown. Above, toward the animal pole, are cells that will form the neurogenic apical plate, the animal portion of the oral ectoderm and its structures including the parts of the ciliated band and the mouth, and the aboral ectoderm, except for the peri-anal portion. Below veg2 are the 4 skeletogenic micromeres. Two of the 4 small micromeres, the descendants of which will be incorporated in the set-aside cells of the coelomic pouches, can be seen protruding from the vegetal pole of the embryo. (b), Mesenchyme blastula stage (24h); the 16 progeny of the skeletogenic cells can be seen to have ingressed into the blastocoel, and the vegetal plate, a disc of cells composing the bottom wall of the embryo, now consists entirely of veg2 lineage cells, except for 8 small micromere descendants in the center (here invisible). Immediately abutting the veg2 cells is a ring of veg1 descendants also seen here in optical section from the side. (c), At late gastrula stage (60h), the tripartite archenteron, or embryonic gut, has formed. Gastrulation begins at 30h, with the

invagination of veg2 cells, and proceeds by a classic process of convergent extension. Veg2 descendants constitute the foregut endoderm and some veg2 mesodermal cells also migrate inward at the anterior end of the foregut. Veg1 descendants many hours later move inward to form the hindgut, and the midgut consists of veg2 descendants on the aboral side and veg1 descendants on the oral side. This asymmetry is due to the much larger amount of late veg1 invagination on the oral side. (d), Endomesodermal cell types deriving from the veg1 and veg2 lineages; same embryo as shown in (c): hindgut, green; posterior and peri-anal ectoderm, dark blue; midgut, pink; foregut, yellow; non-skeletogenic mesoderm cells, light blue. The skeletogenic, apical plate and oral and aboral ectoderm cells not of veg1 or veg2 origin are left uncolored, aboral ectoderm facing left, oral right. The mouth or stomodeum will form where the archenteron approaches the oral ectoderm. (e,g), Schematic displays of the disposition of veg1 and veg2 cell lineages superimposed on vegetal views of 18h (e) and 24h (g) embryos. Radially, from center, small micromeres, dark red; skeletogenic micromeres, pink; veg2 descendants, green; veg1 descendants, orange. (f,h), Cell fate maps from vegetal views; the embryo in (f) is the same 18h embryo as in (e), and that in (h) the same 24h embryo as in (g). In (f) and (h) the small micromeres are shown in dark red; skeletogenic micromeres in pink; veg2 progenitor cells of mesodermal cell types in cyan; veg2 progenitor cells of anterior endoderm, in yellow; veg1 progenitor cells of posterior endoderm in orange. Note that between 18 and 24h the skeletogenic cells have disappeared from the vegetal plate here portrayed, having by now ingressed as seen in (c). (i), Exact origin of the veg1 and veg2 lineages. The diagram is a lateral view of the 16-cell, 4<sup>th</sup> cleavage embryo, the macromere grandparents of veg1 and veg2 outlined in red. The lineage diagram displays the macromere descendants throughout the remainder of cleavage. These form a ring of 8 cells at 5<sup>th</sup> cleavage, and then the veg1 (orange) and veg2 (green) lineages are founded at 6<sup>th</sup> cleavage as in (a). One of four identical macromere lineages is shown. (k), chart indicating cell types arising from the 4th cleavage mesomeres, macromeres, and micromeres (see key in (i)).

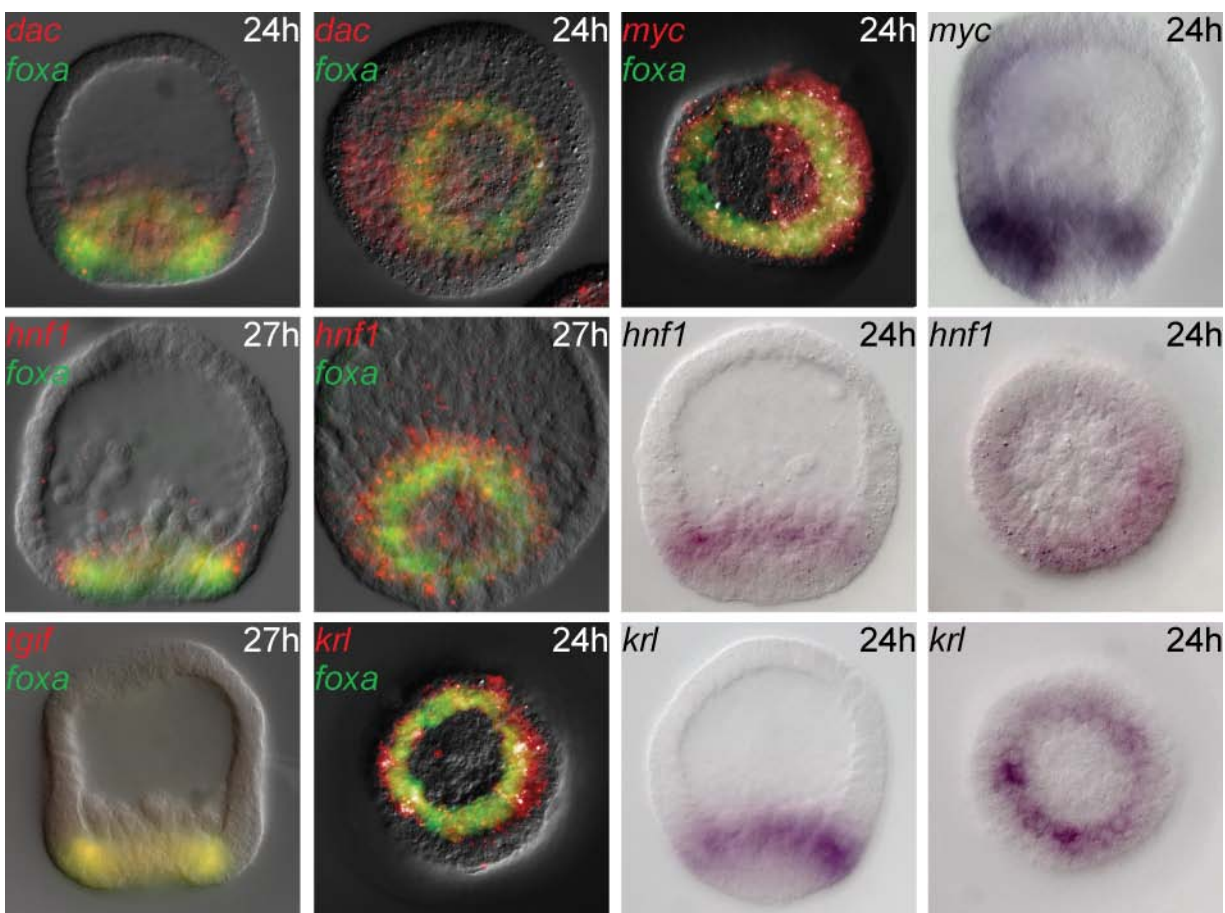

**Supplementary Figure 2. Whole mount in situ hybridization (WMISH) of the endoderm genes *dac*, *myc*, *hnf1*, *tgif*, *krl*, and *foxa* at 24 and 27h.** Double fluorescent WMISH shows that *dac* expression is coincident with *foxa* expression; i.e., *dac* is expressed in veg2 endoderm (side view left, vegetal view right). The *myc* gene is expressed in veg2 endoderm and part of veg2 mesoderm precursors, as seen in vegetal view in the double WMISH, and from the side in the single WMISH; also expressed in veg2 endoderm are *tgif*, lateral view, and *krl*, vegetal view, again as demonstrated by coincidence with the *foxa* expression domains by double WMISH. Expression of *krl* in a typical veg2 pattern is also seen in the single WMISH displays from lateral and vegetal views. In contrast, *hnf1* is expressed outside the veg2 domain marked by *foxa* expression, i.e., it is a veg1 endoderm gene. This is seen in the lateral and vegetal view double WMISH, left, and in the lateral and vegetal single WMISH, right.

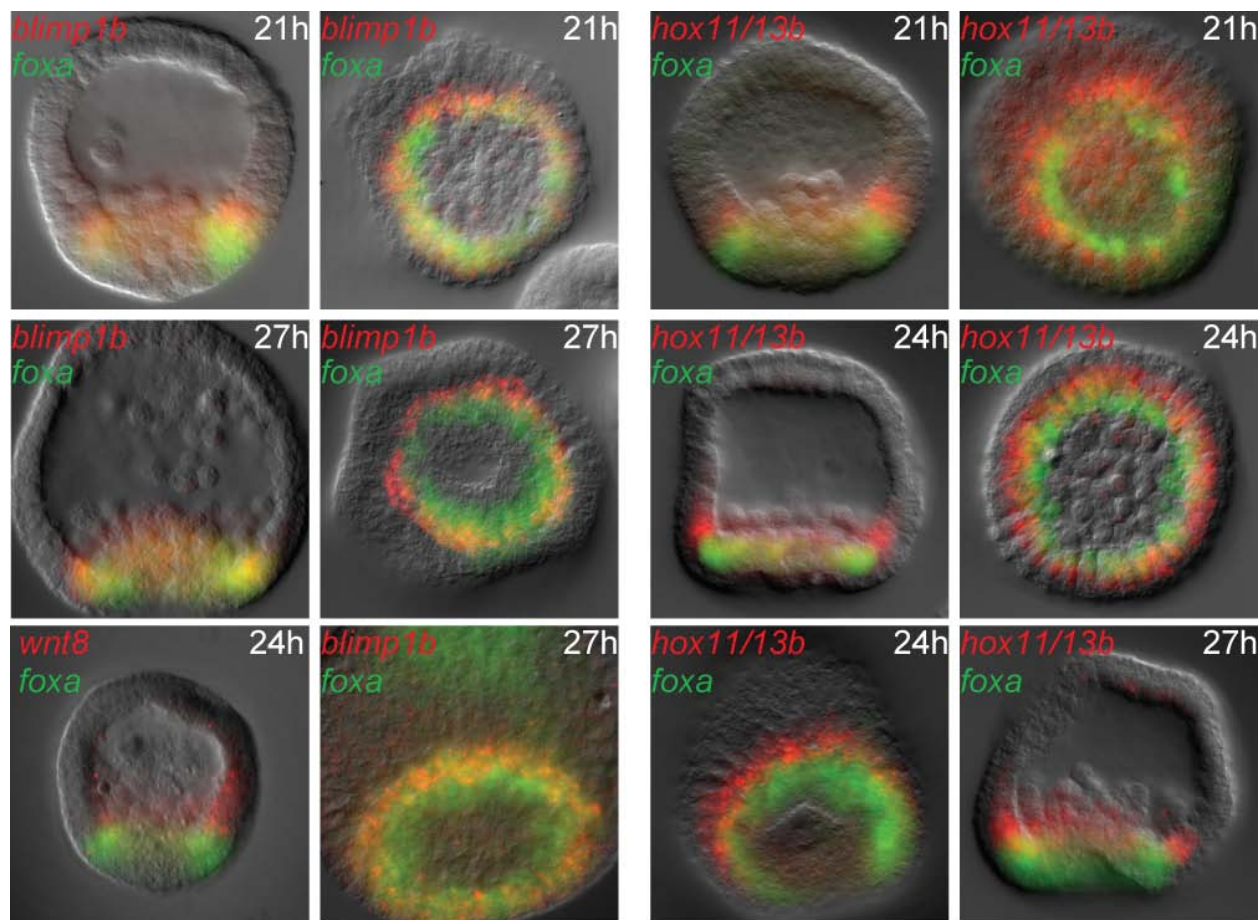

**Supplementary Figure 3. WMISH of the endoderm genes *blimp1b*, *hox11/13b*, *wnt8* and *foxa* at 21, 24, and 27 h.** The progression of *blimp1b* expression is shown at 21 and 27h from lateral and vegetal views (left columns) by double WMISH with *foxa*, which serves as a marker for veg2 endoderm up to 30h. Note that at 27h the inner ring of *foxa* expressing cells has turned off *blimp1b* expression. *Blimp1b* is now restricted to peripheral veg2 descendants, mostly overlapping with *foxa* expression, but possibly asymmetrical with respect to the oral/aboral axis. This could presage the differential contribution of veg2 and veg1 across this axis in the future midgut (Supplementary Fig.1c). At lower left a double WMISH shows that by 24h *wnt8* is expressed exclusively in veg1 as there is no overlap with the *foxa* expression domain. Over the whole 21-27h period *hox11/13b* is also expressed only in veg1 as seen in lateral and vegetal views by double WMISH with *foxa*.

Figure S4

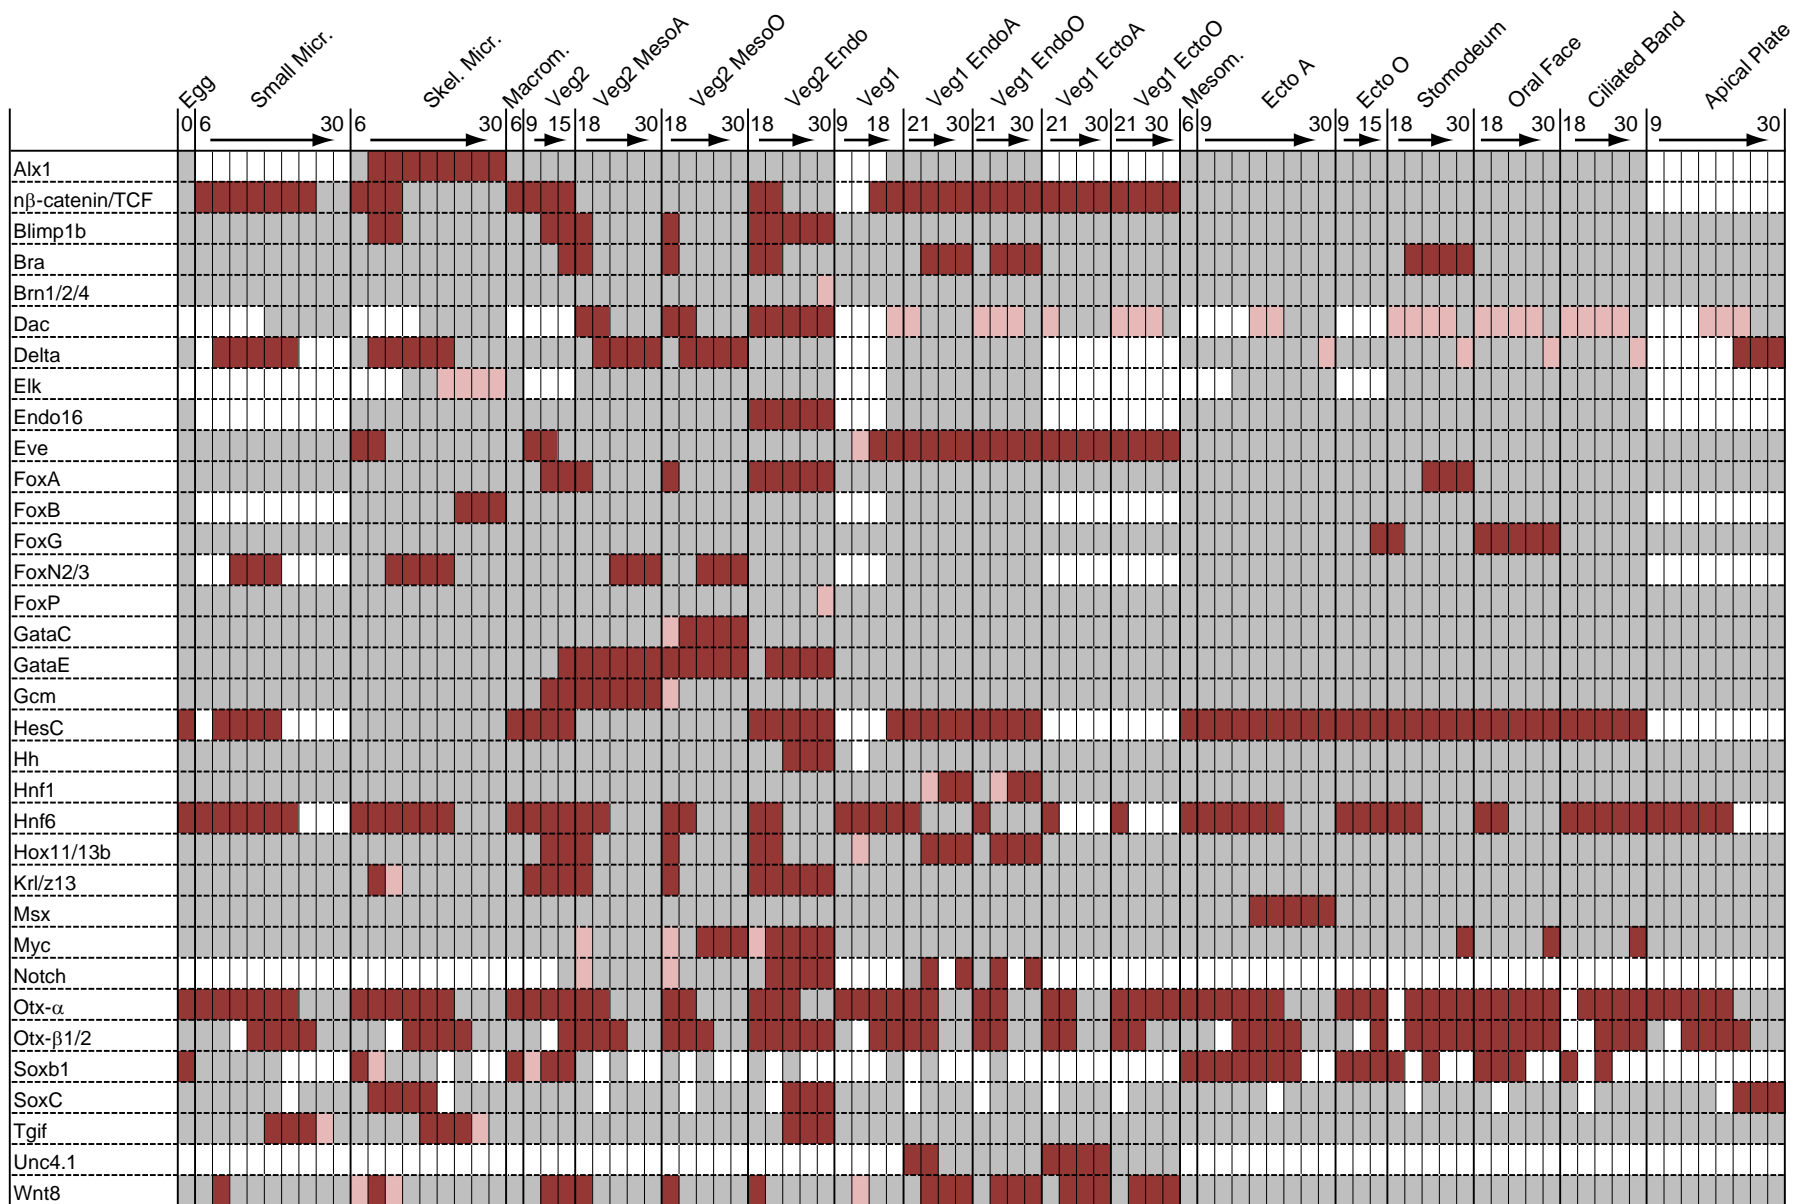

**Supplementary Figure 4. Digital spatial and temporal expression chart for all genes included in this study.** Genes are listed alphabetically in left column. Each cell in the vertical columns of the chart represents a 3h interval, and the spatial domains of the embryo are indicated for the periods (h post fertilization) at which they obtain, across the top of the chart: Micr., micromeres; Skel., skeletogenic; MesoA., aboral non-skeletogenic mesoderm; MesoO., oral non-skeletogenic mesoderm; Endo., endoderm; EndoA., aboral endoderm; EndoO., oral endoderm; EctoA., aboral ectoderm; EctoO, oral ectoderm; Mesom., mesomeres.

Figure S5

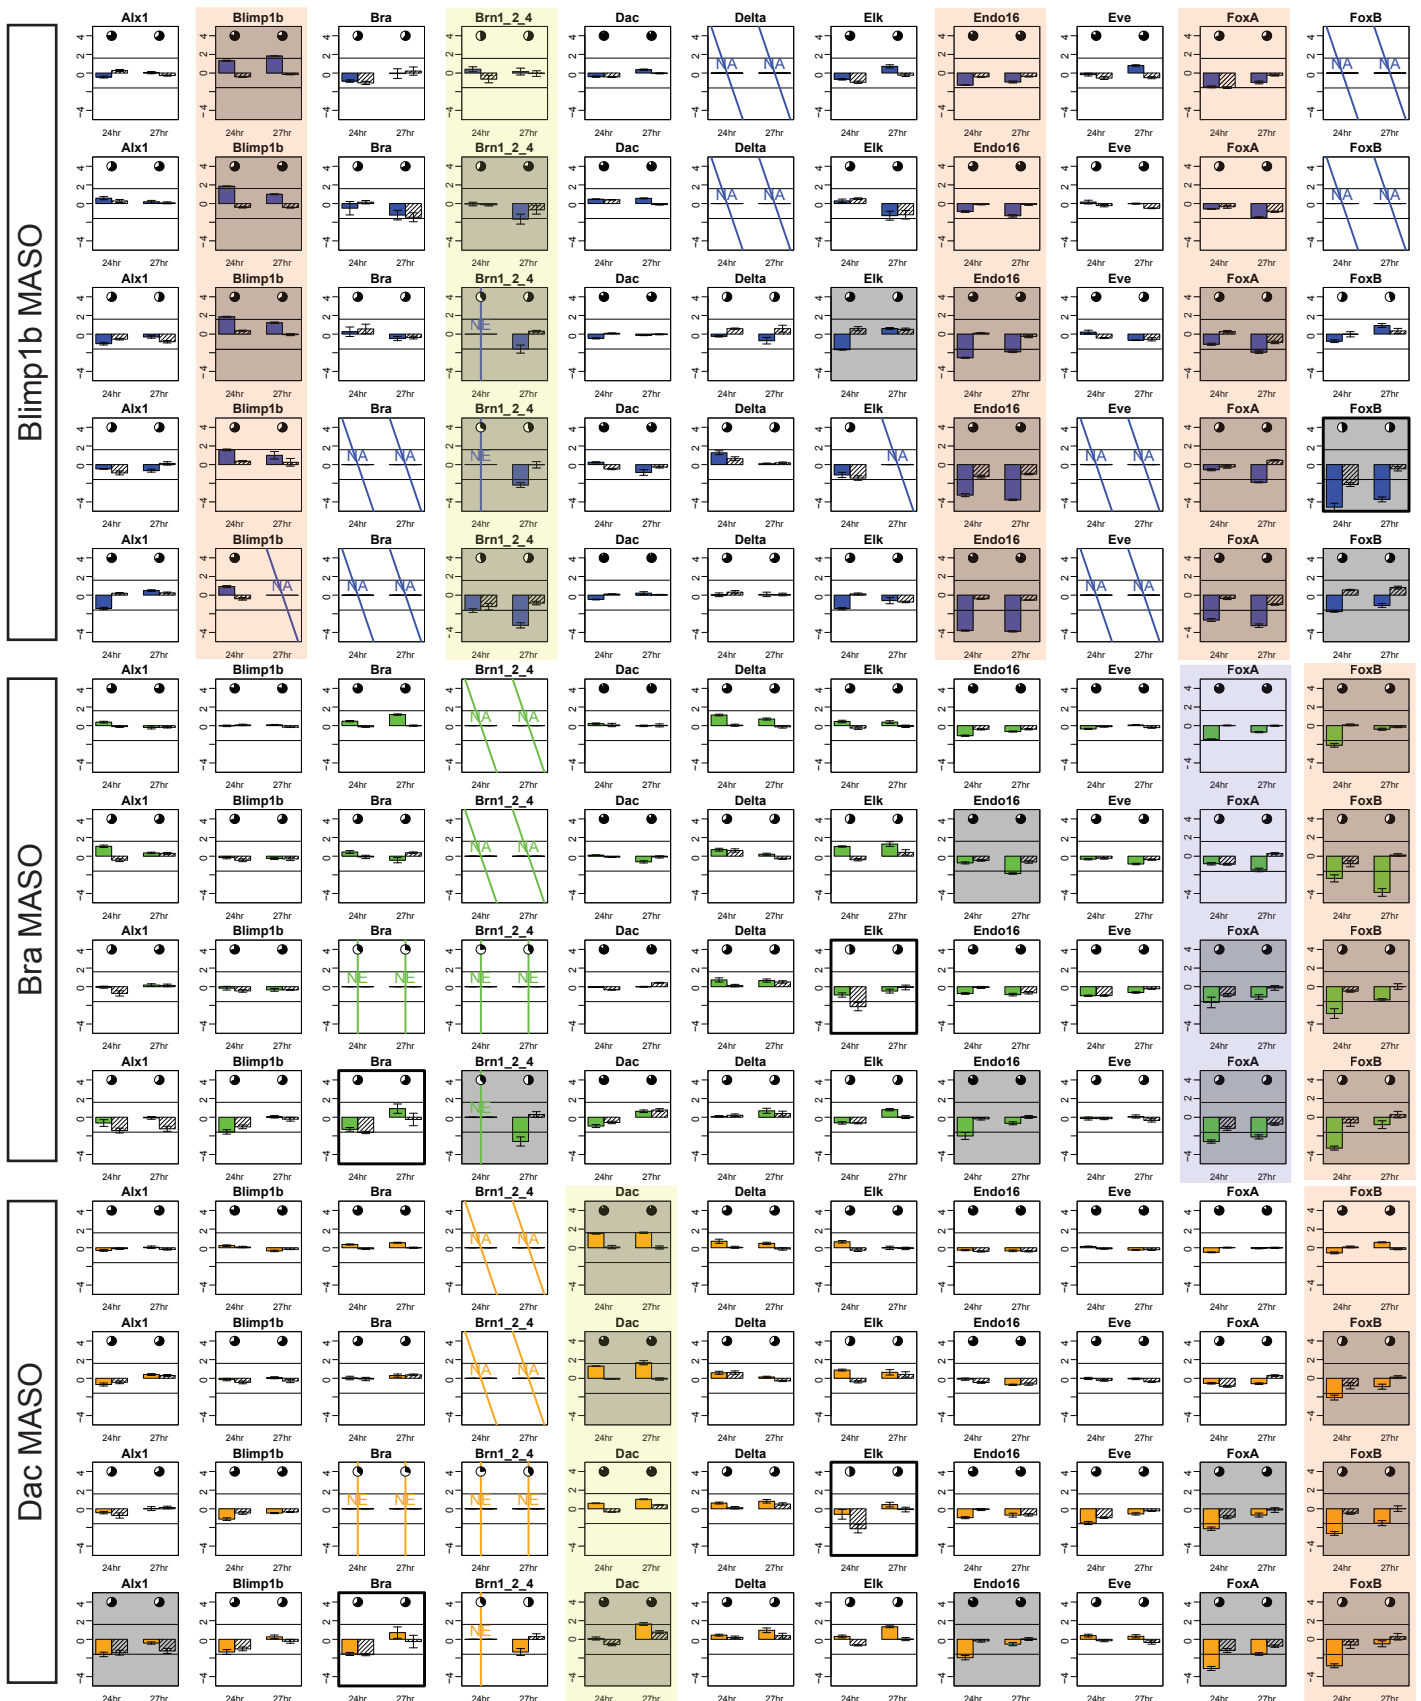



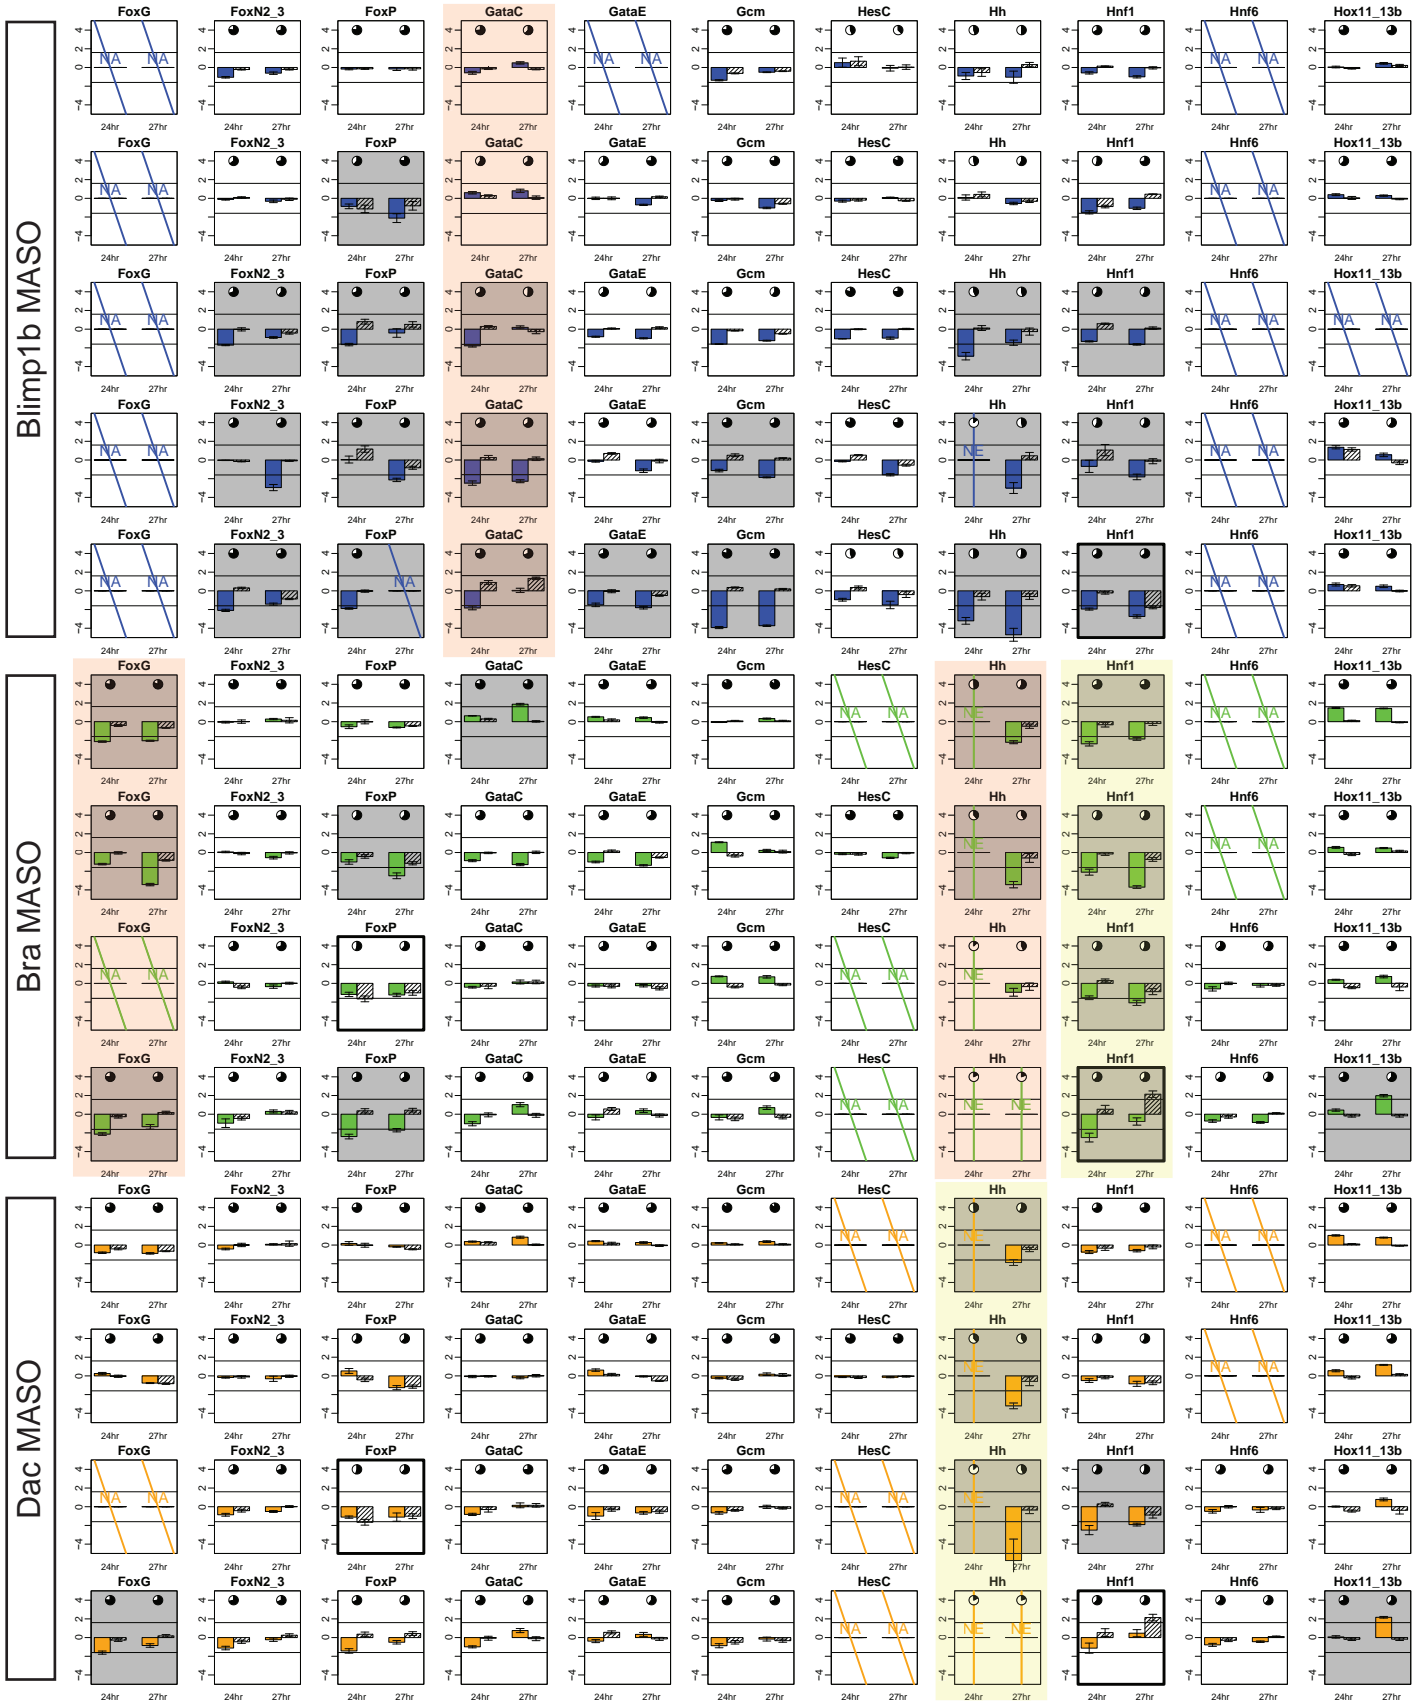

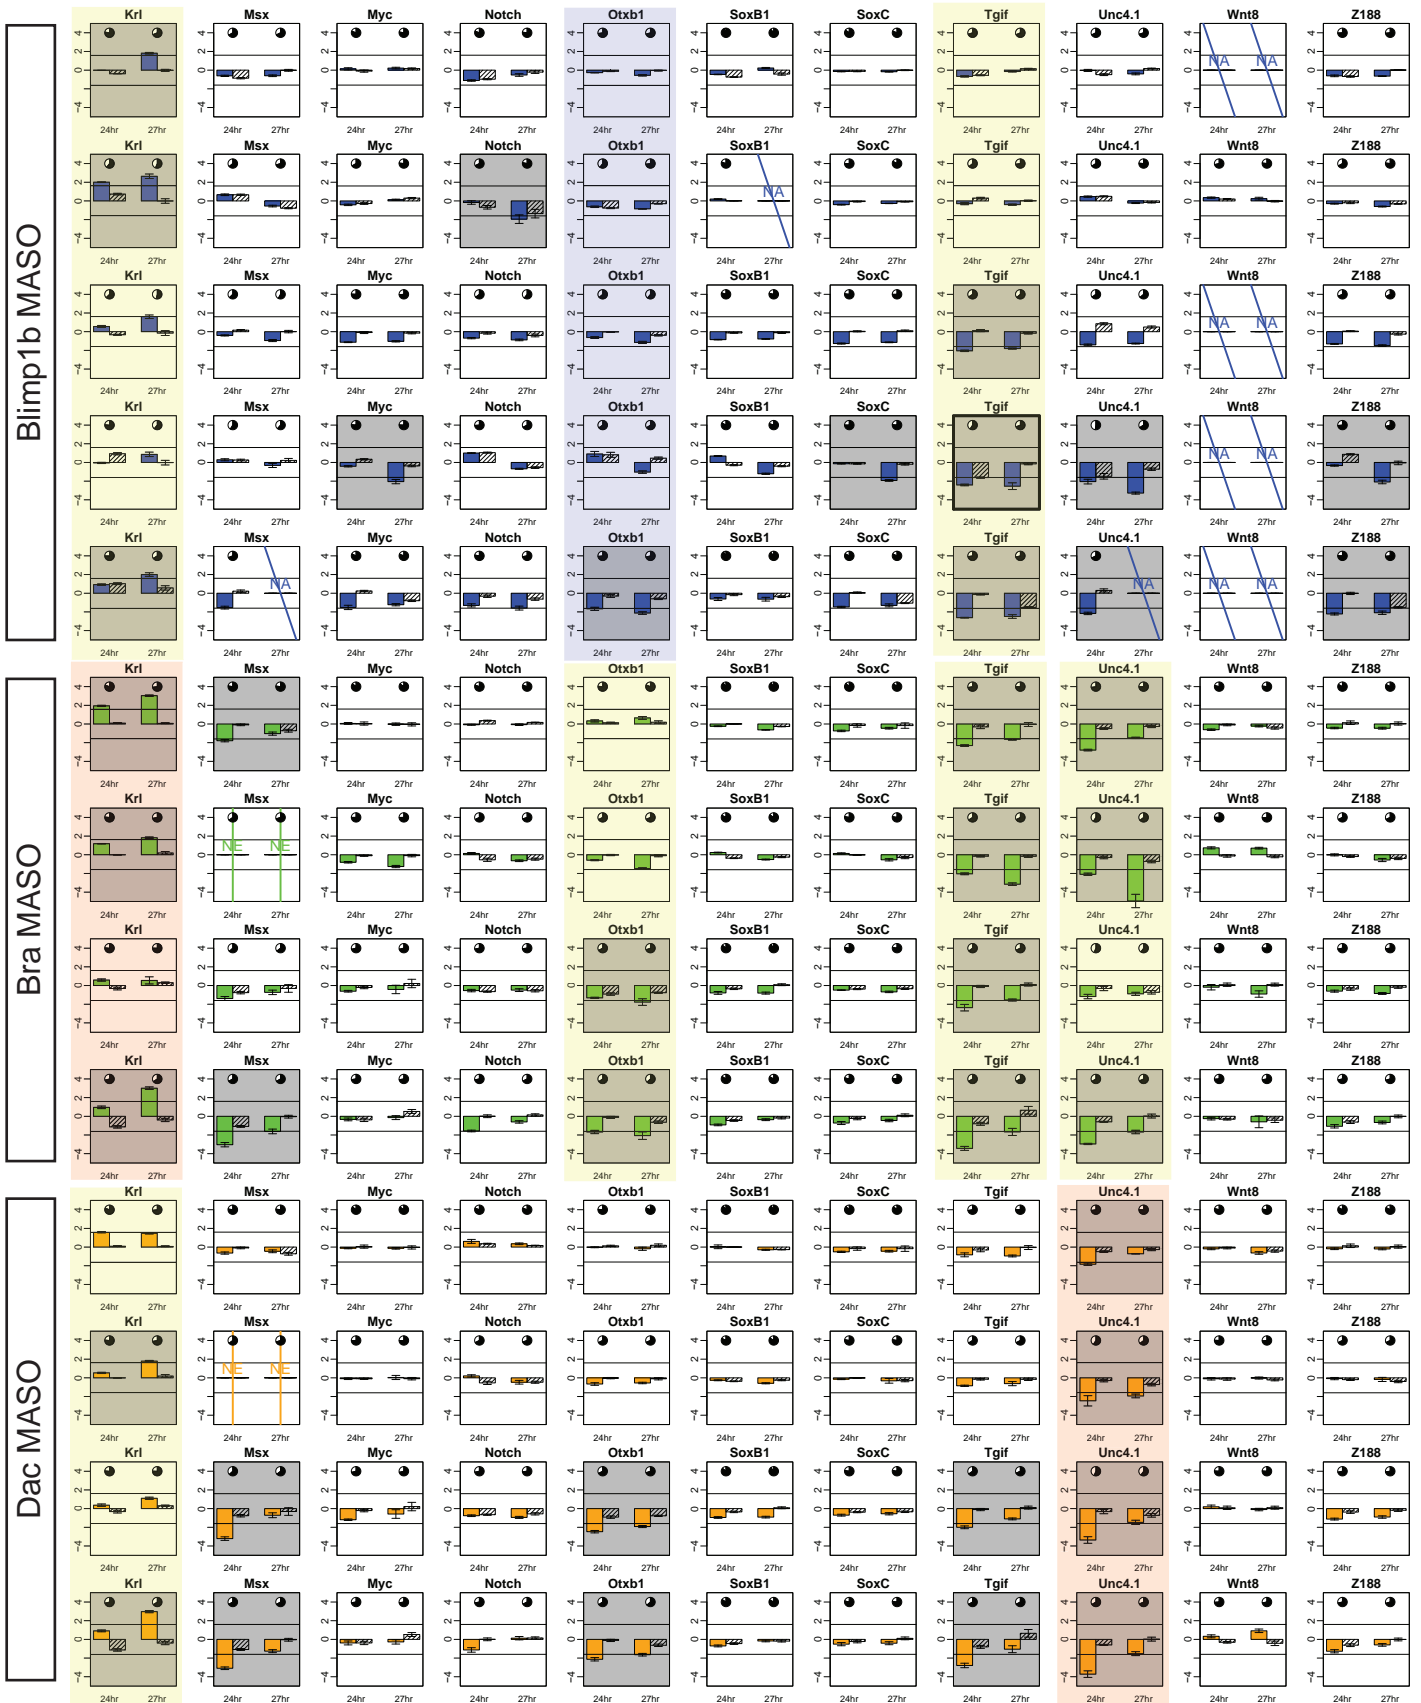

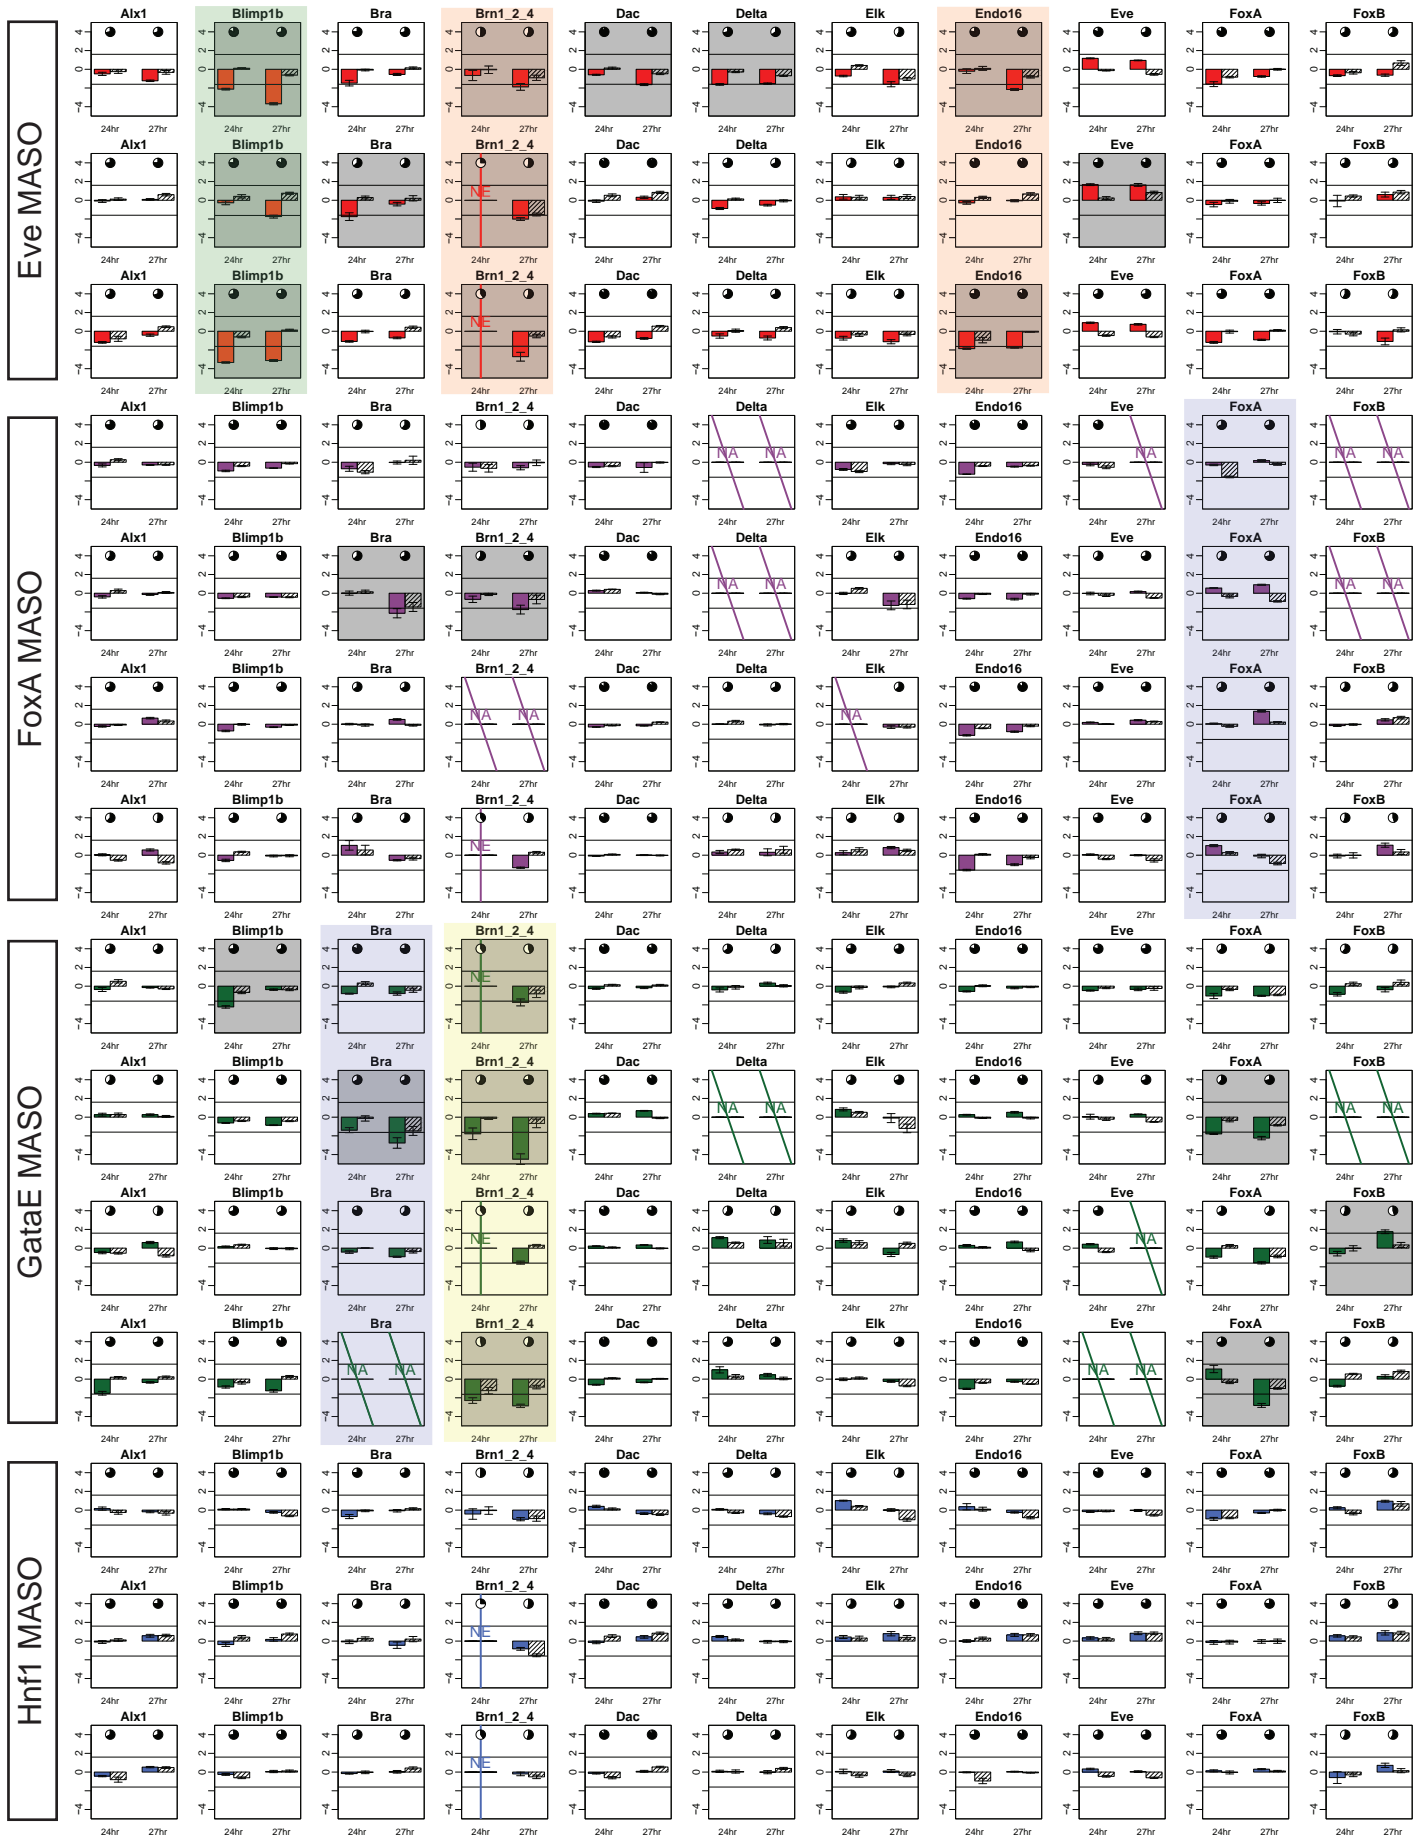

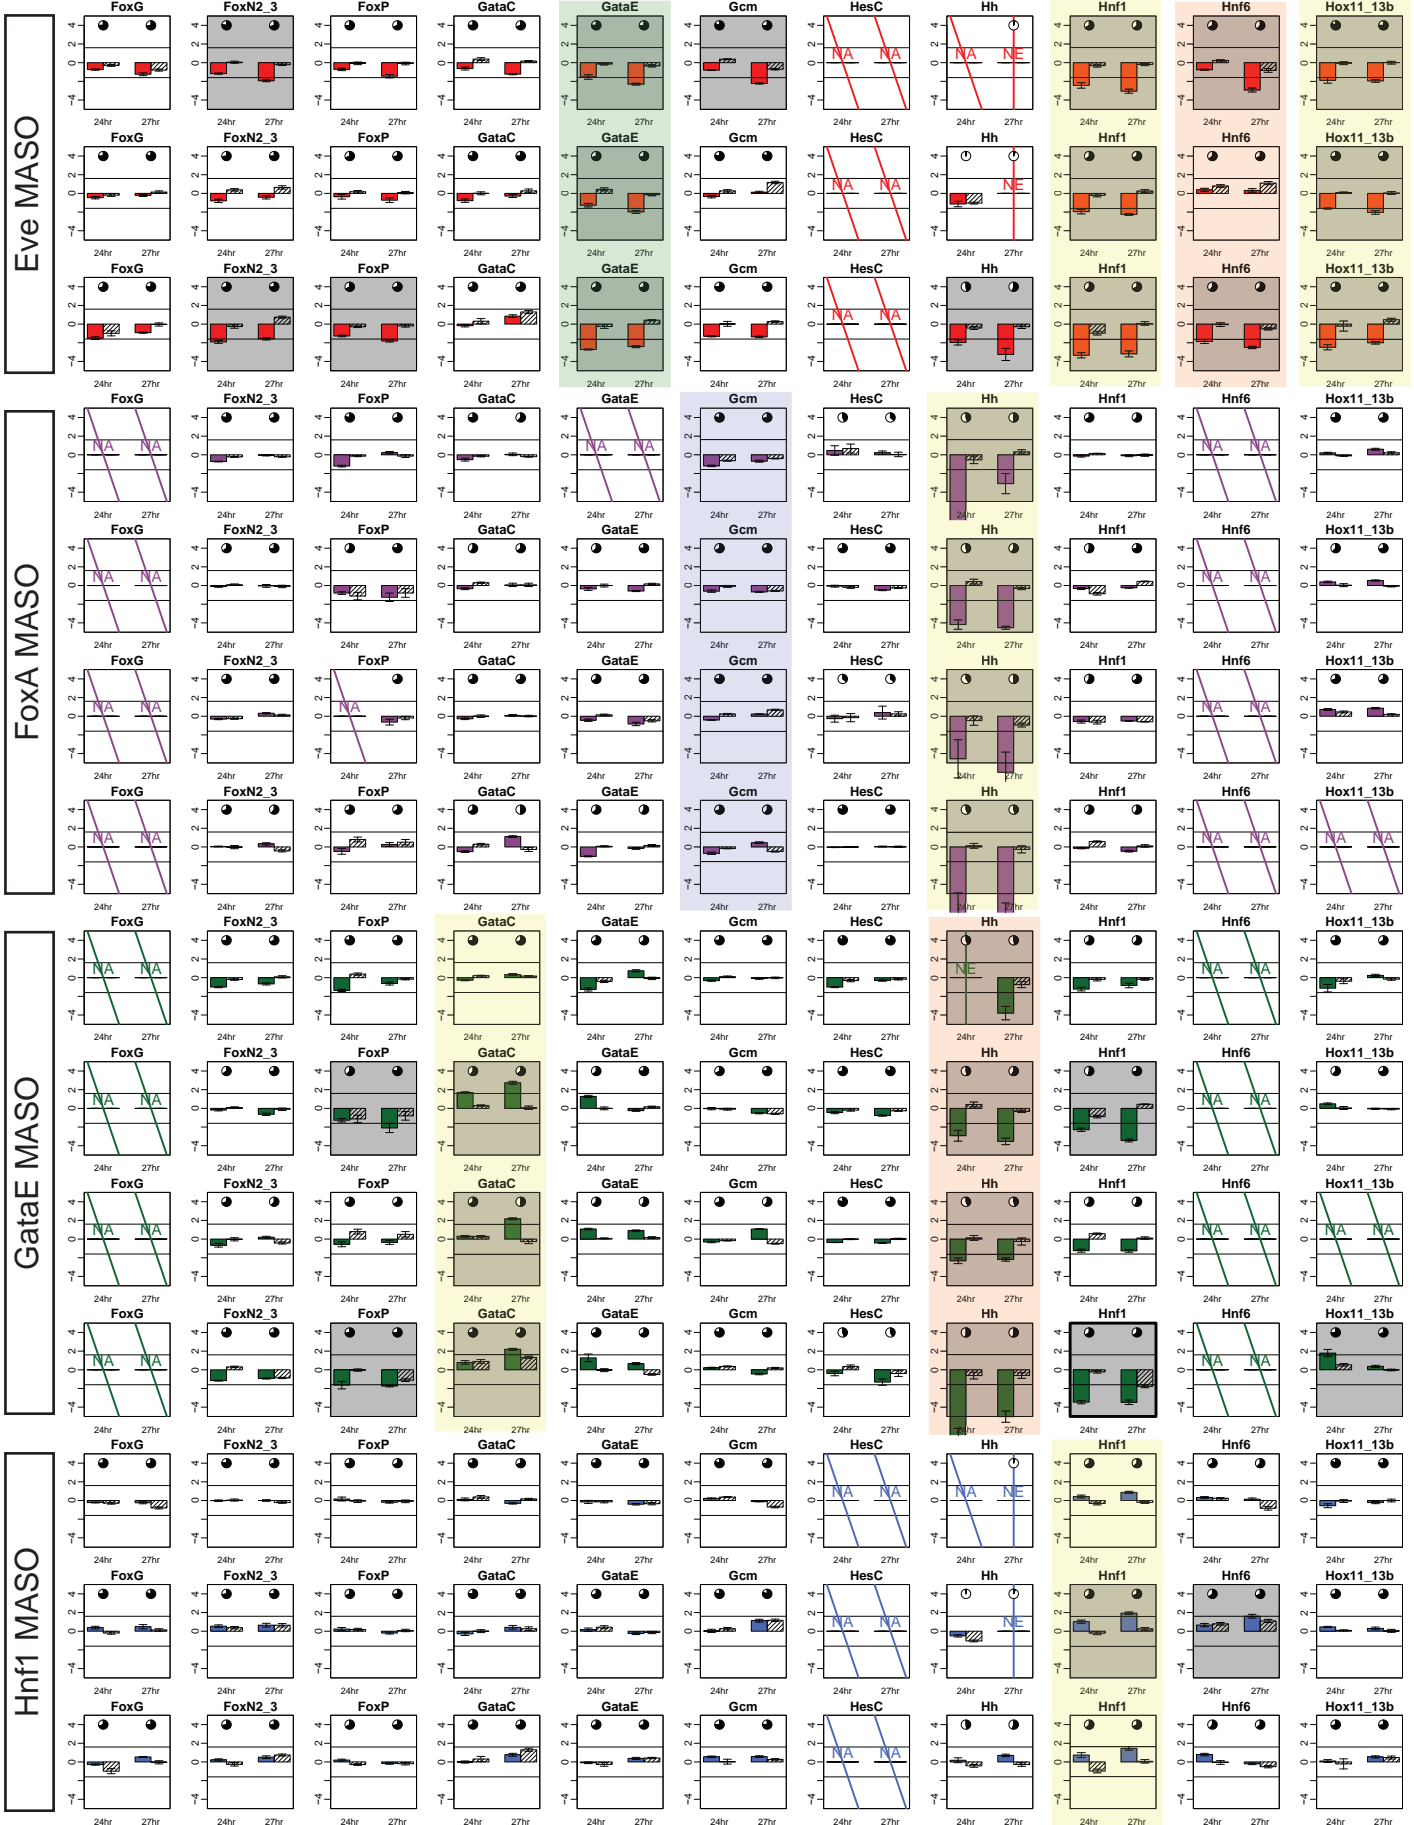

Eve MASO

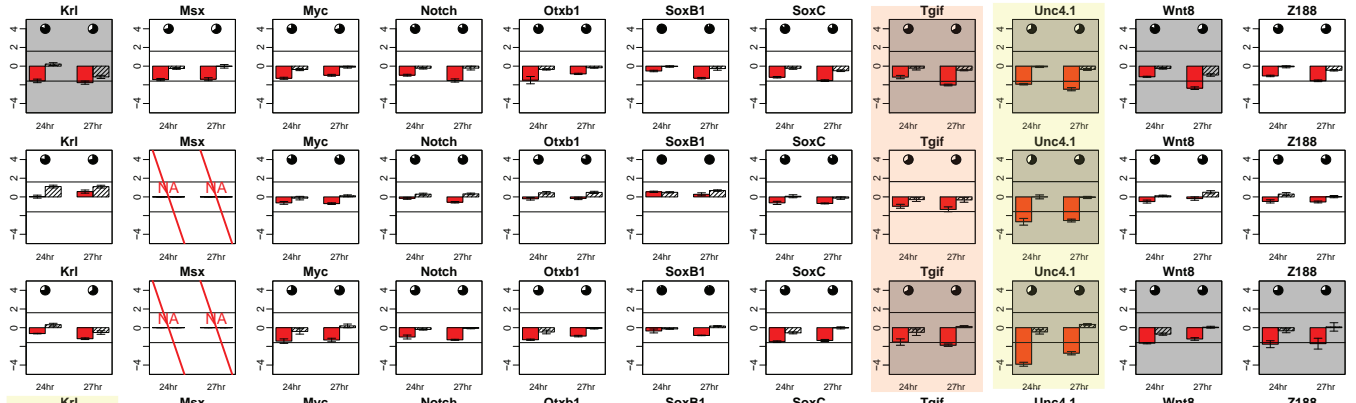

FoxA MASO

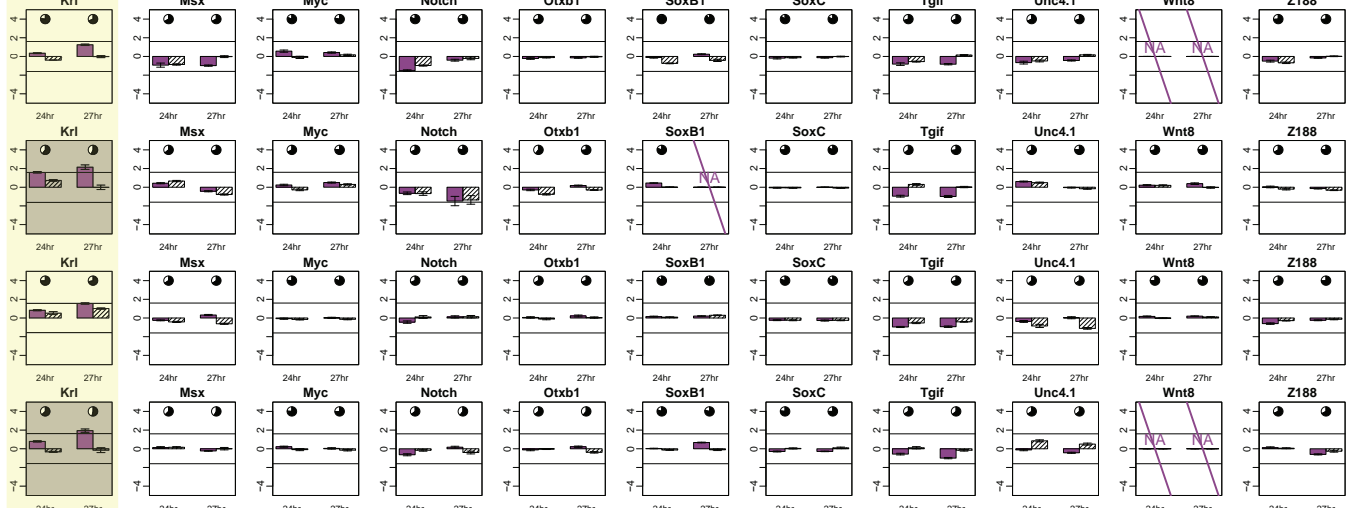

GataE MASO

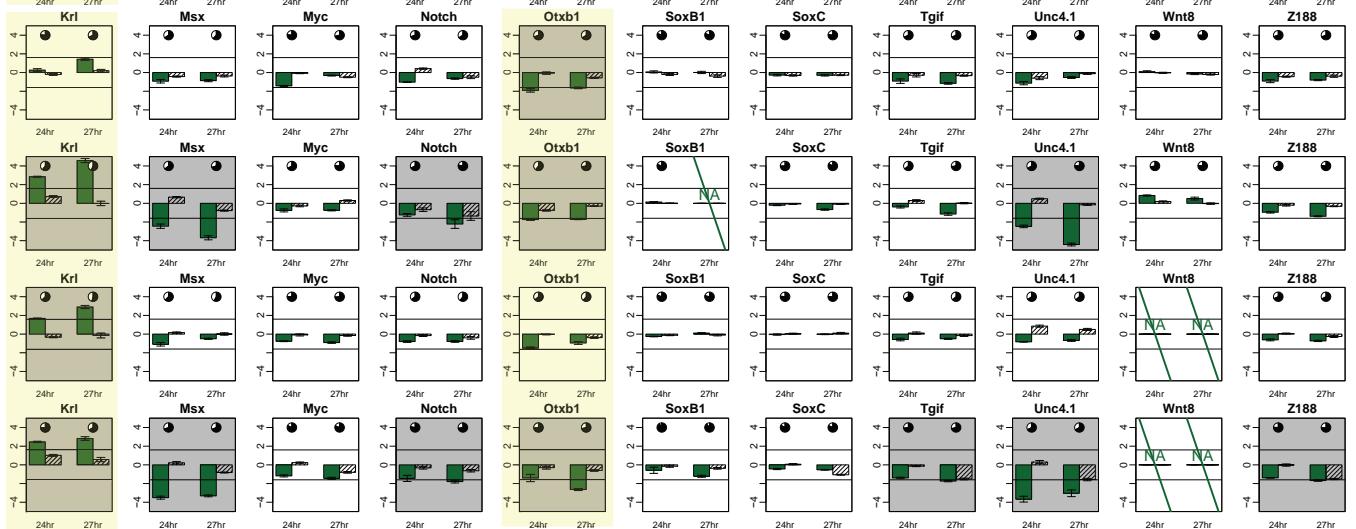

Hnf1 MASO

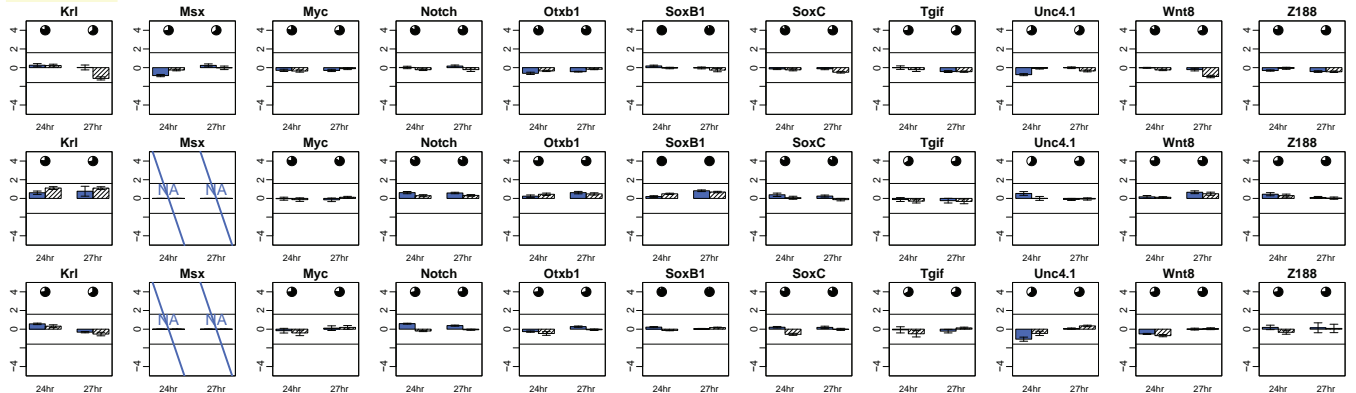

Hox11/13b MASO

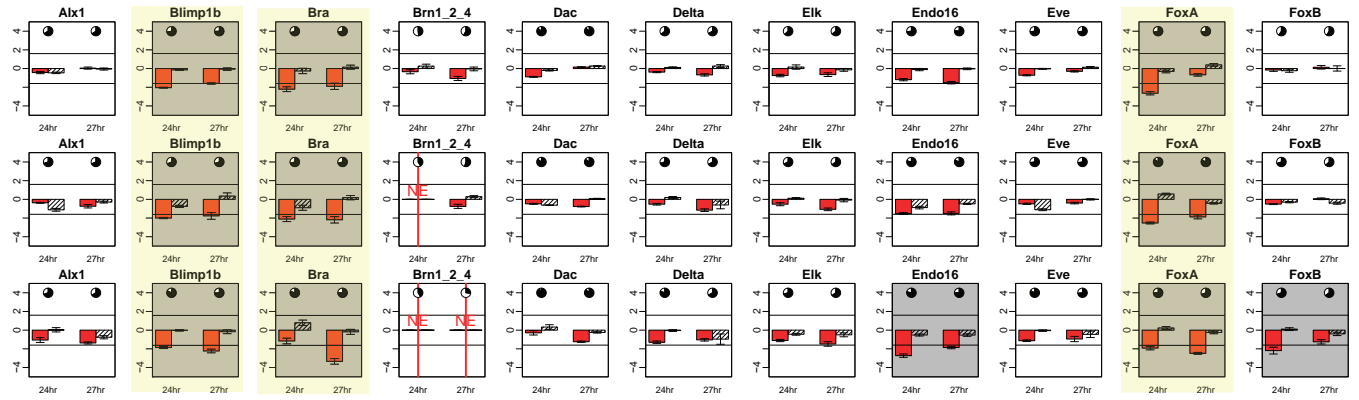

Krl MASO

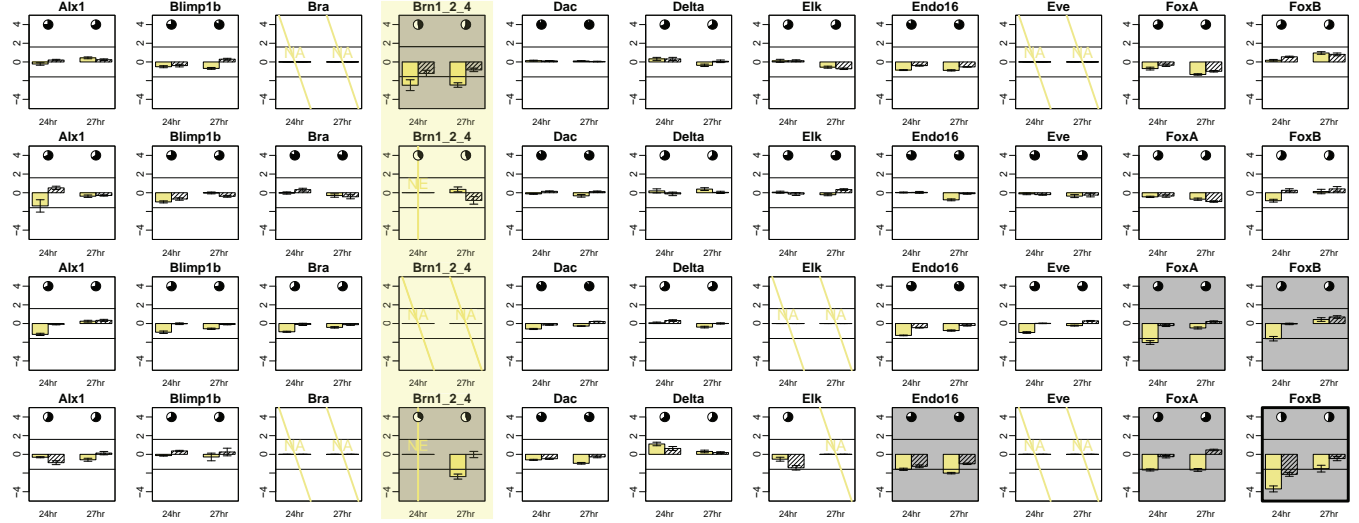

Myc MASO

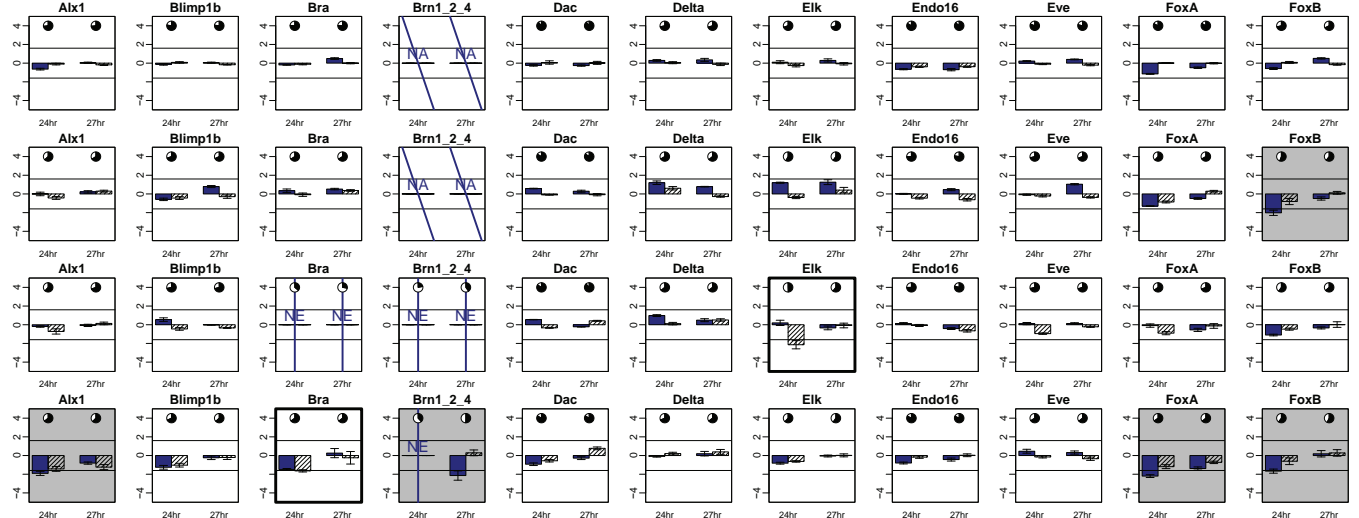

Notch MASO

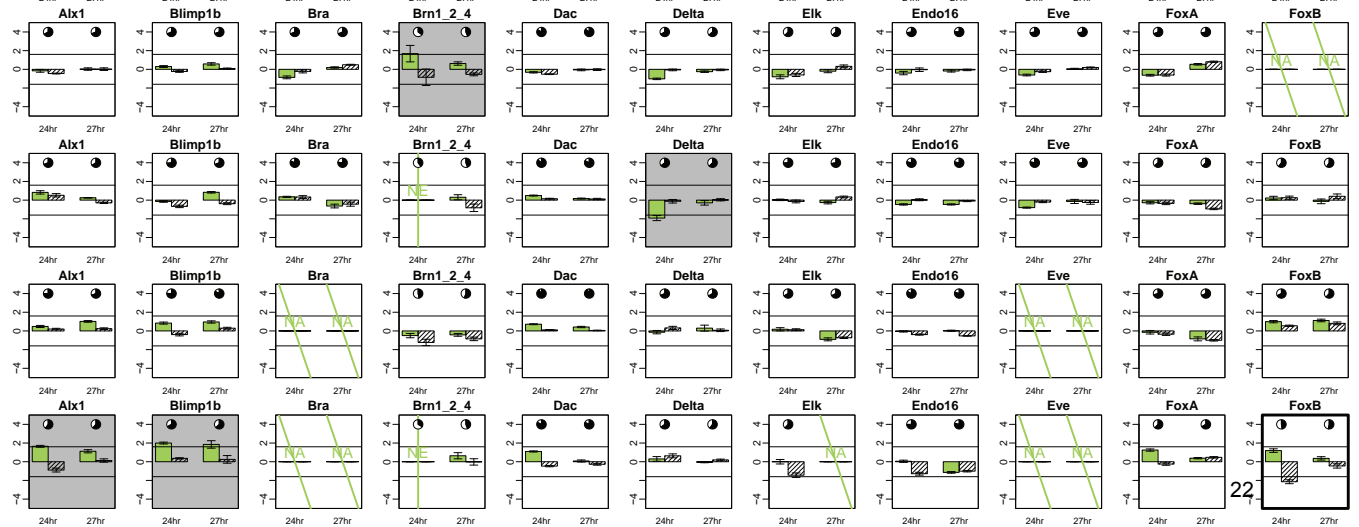

Hox11/13b MASO

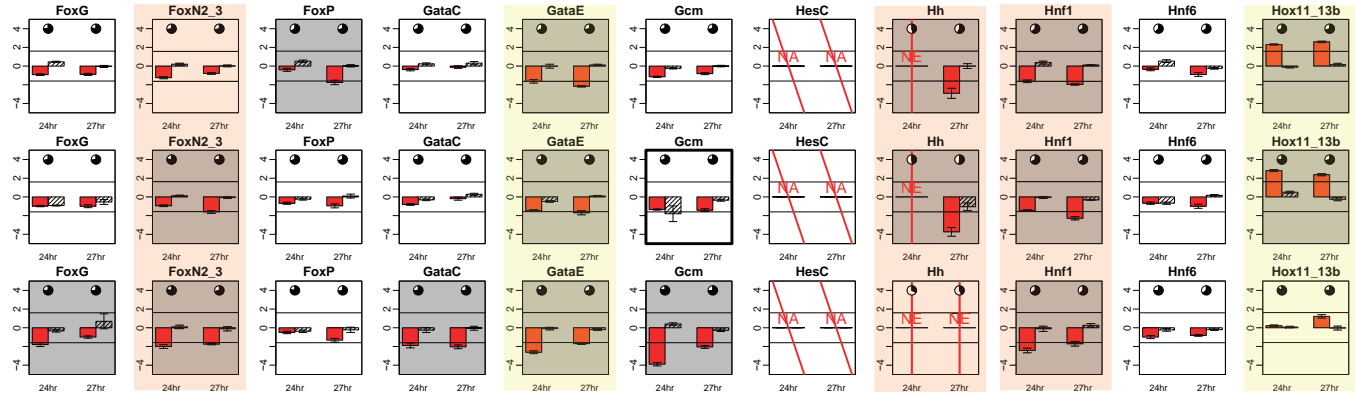

Krl MASO

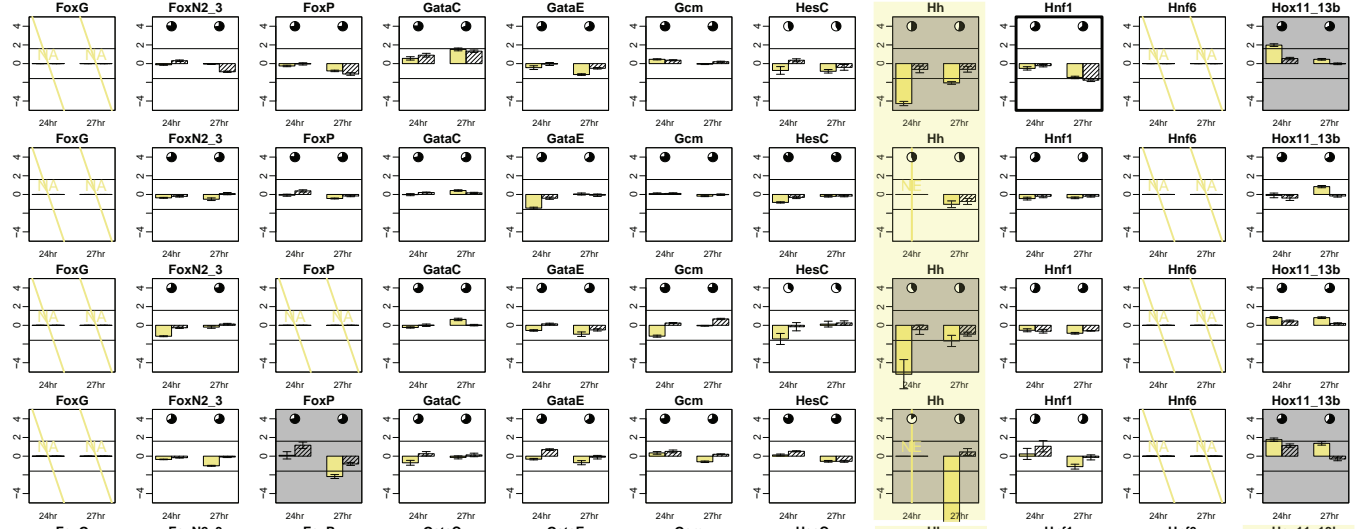

Myc MASO

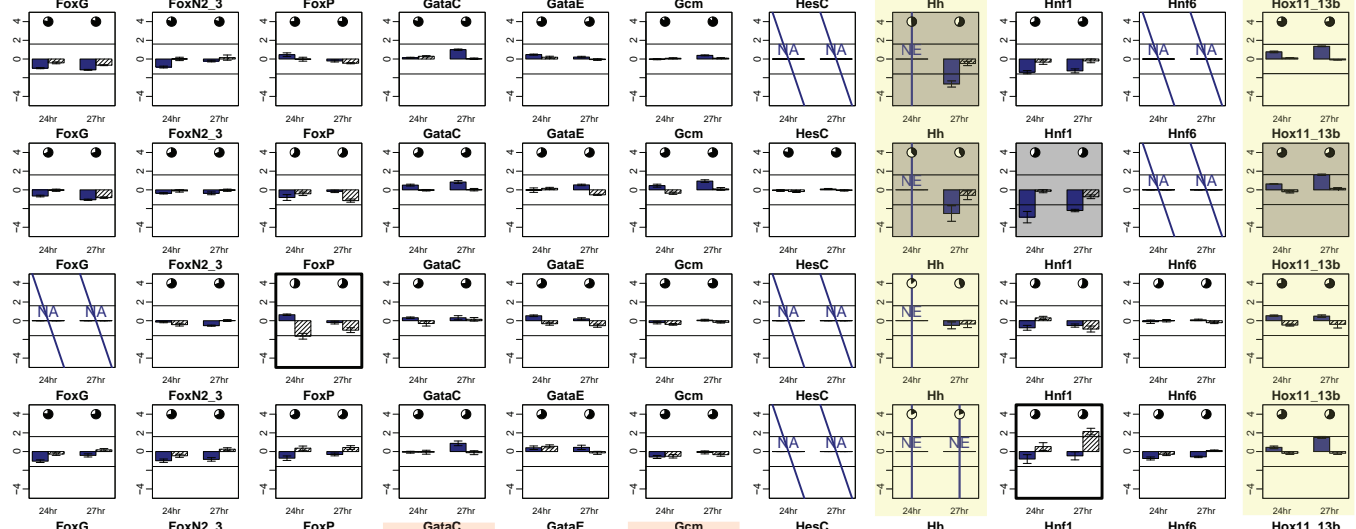

Notch MASO

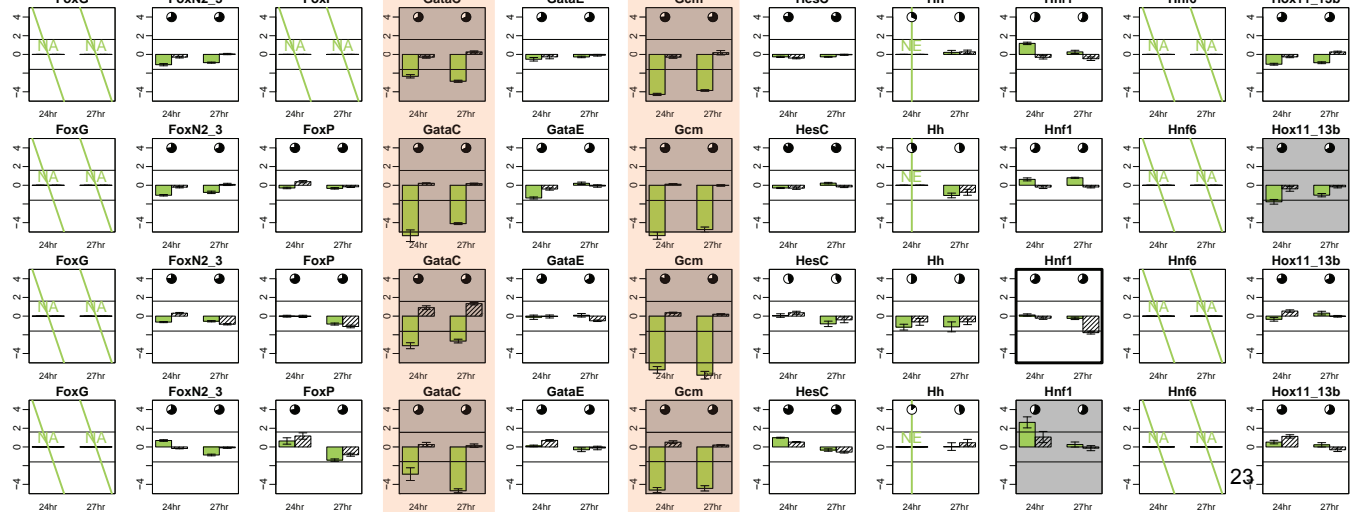

Hox11/13b MASO

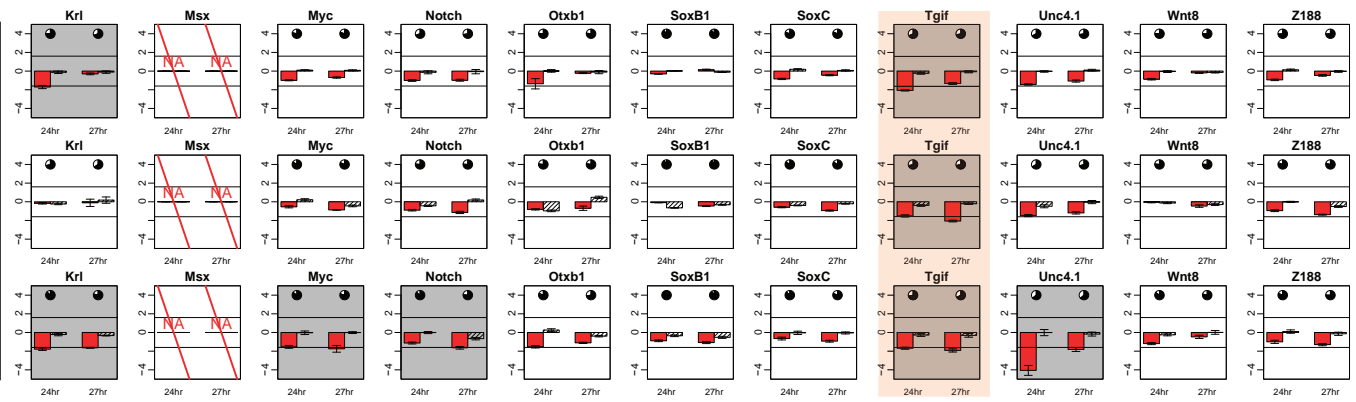

Krl MASO

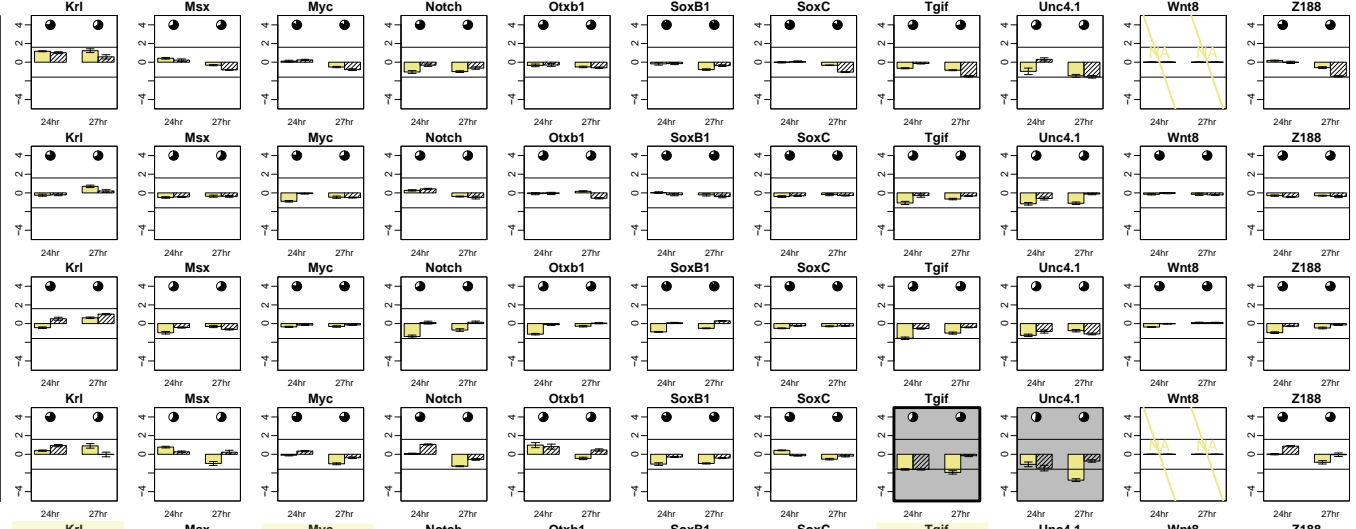

Myc MASO

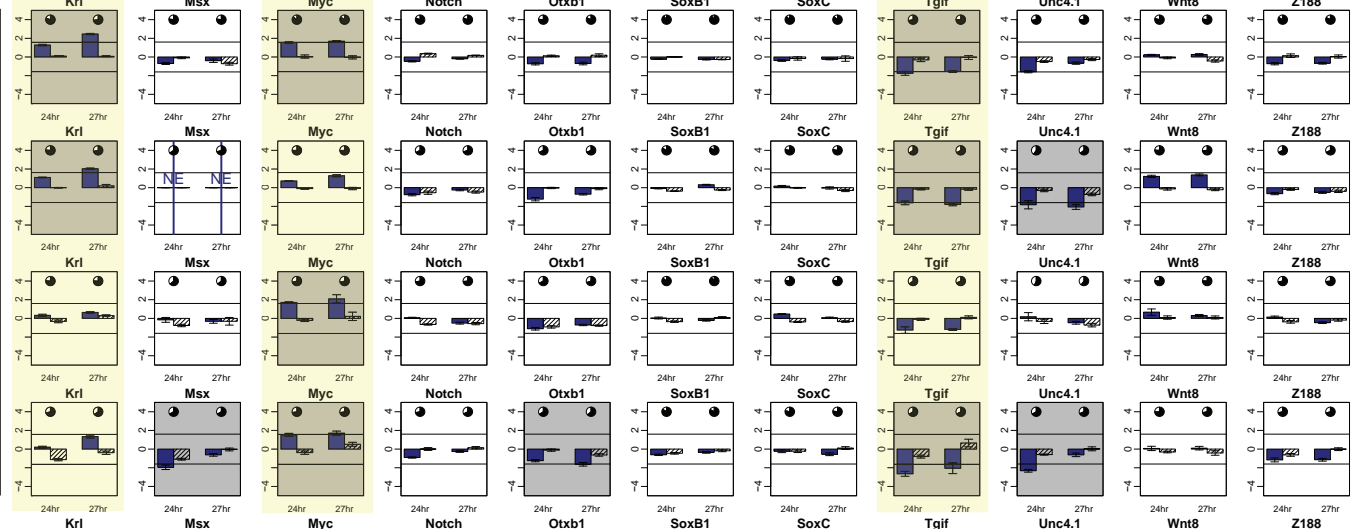

Notch MASO

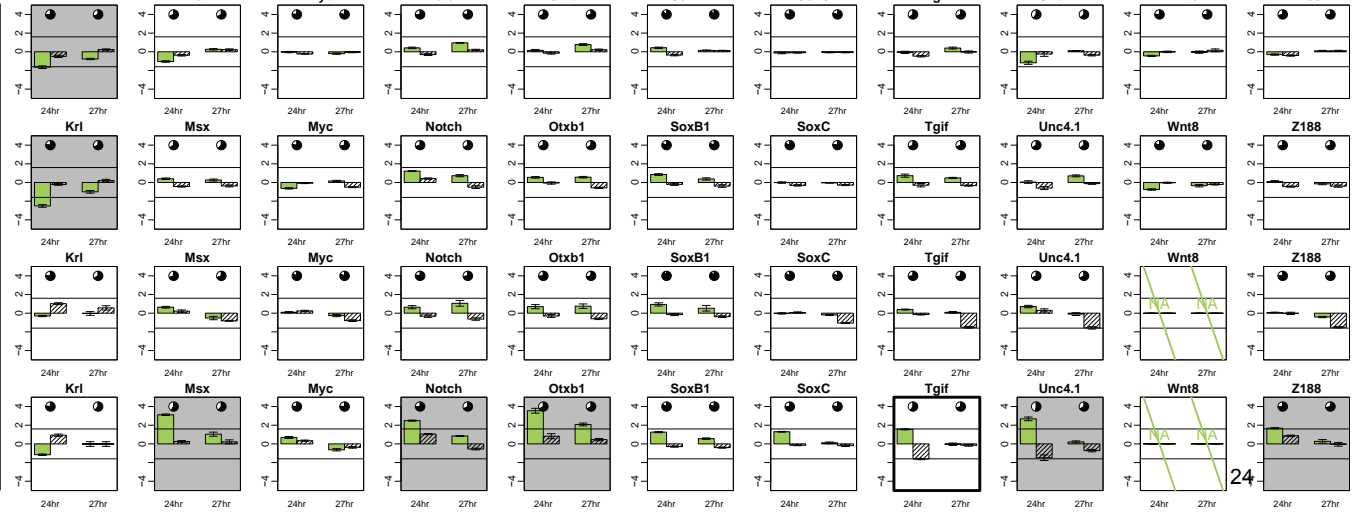



Otx-HD MASO

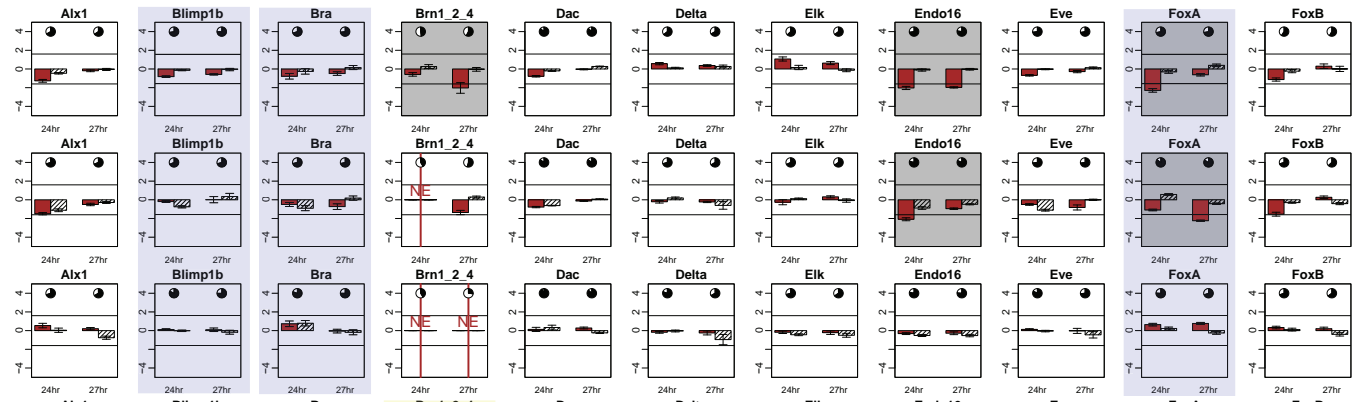

Otx $\alpha$  MASO

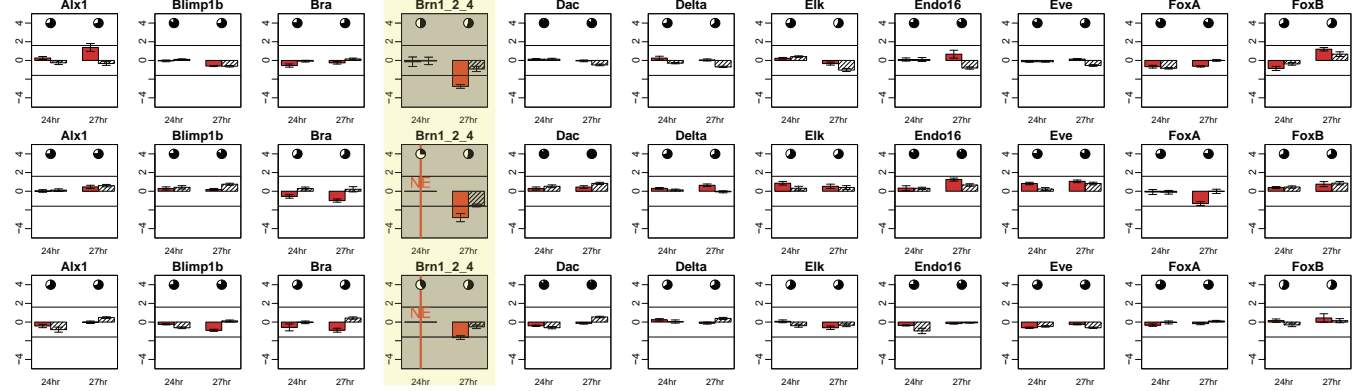

SoxC MASO

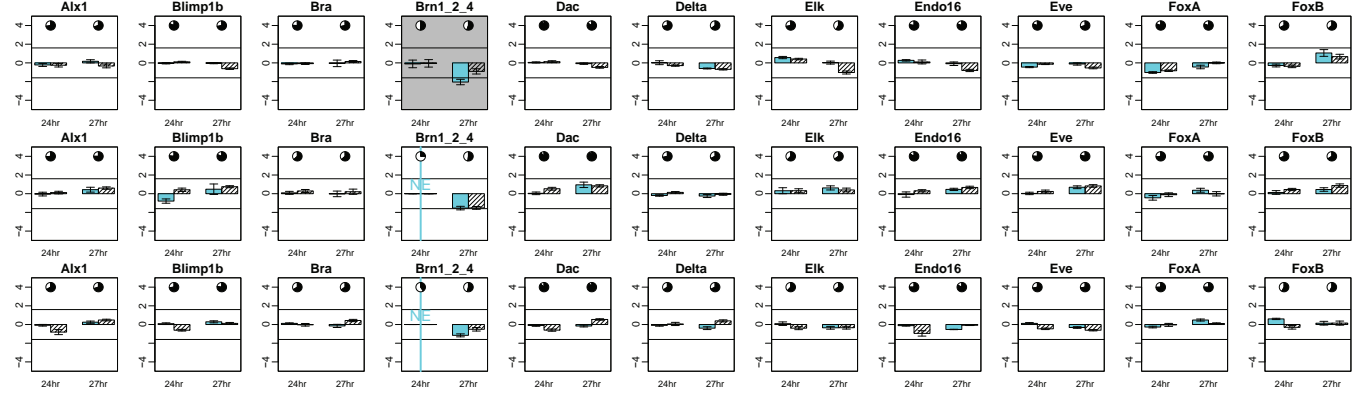

Tgif MASO

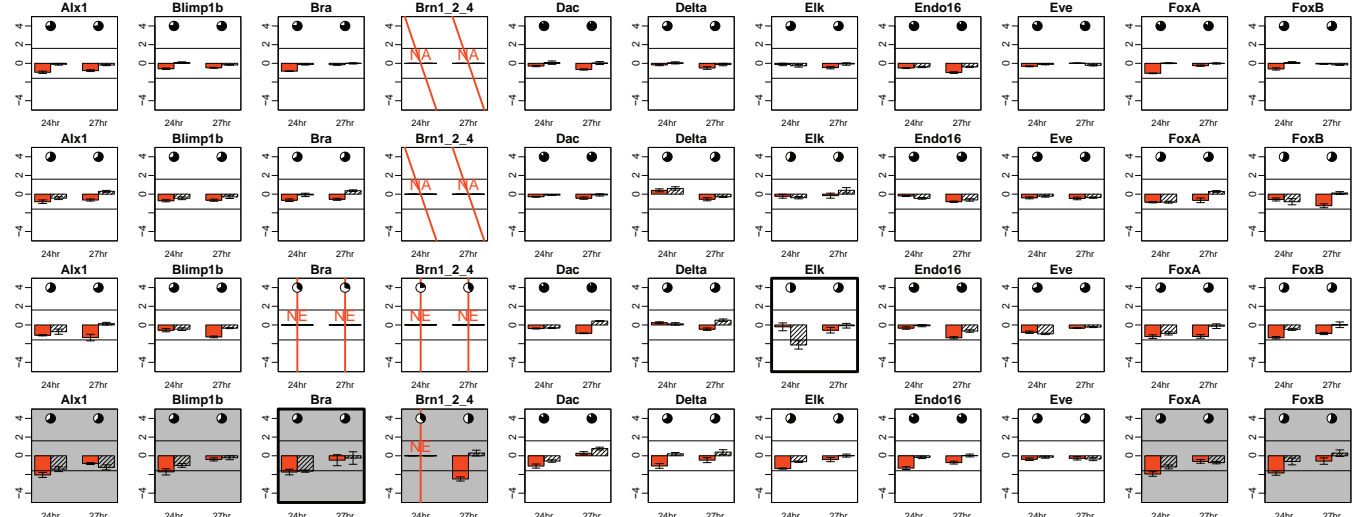

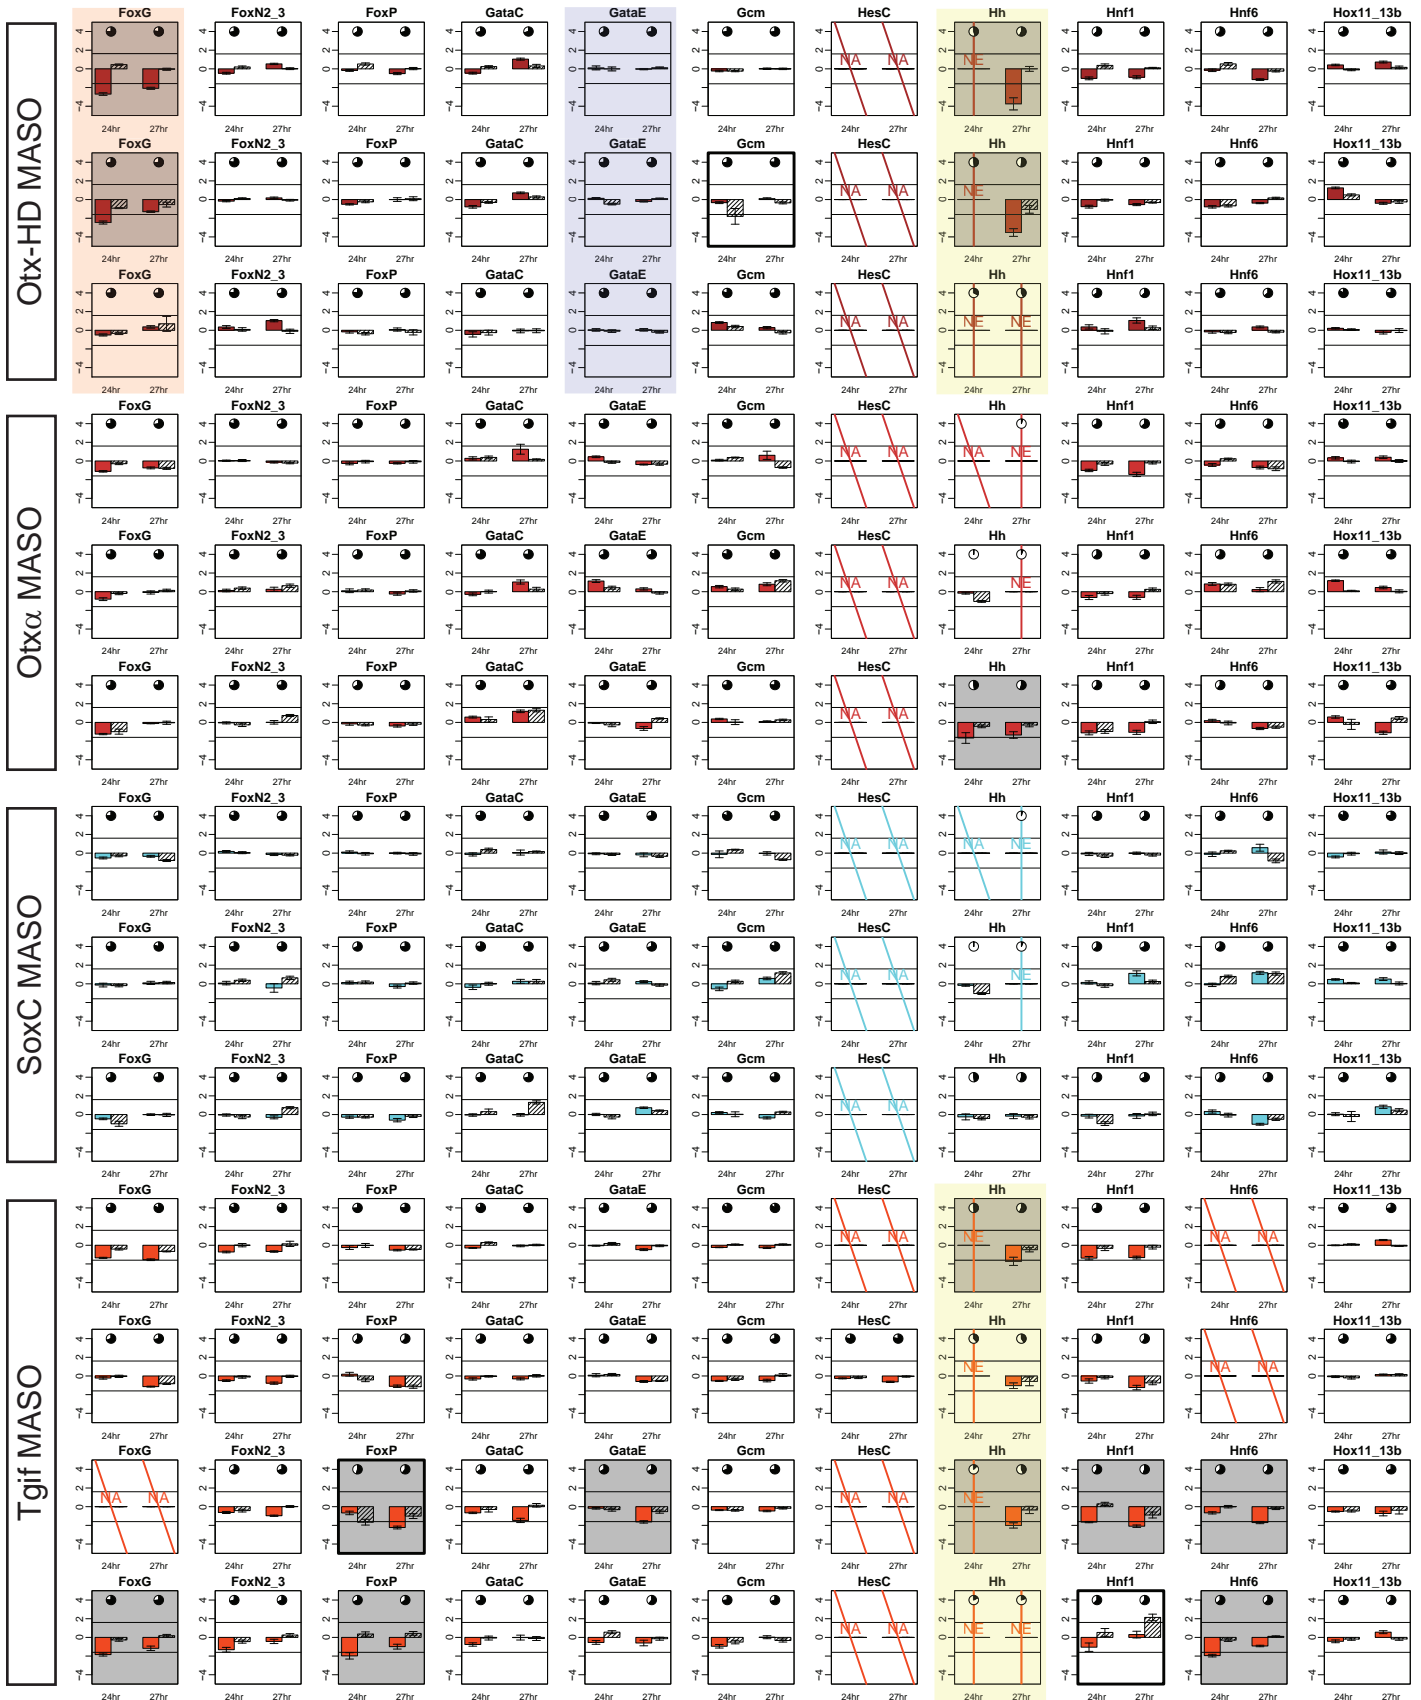

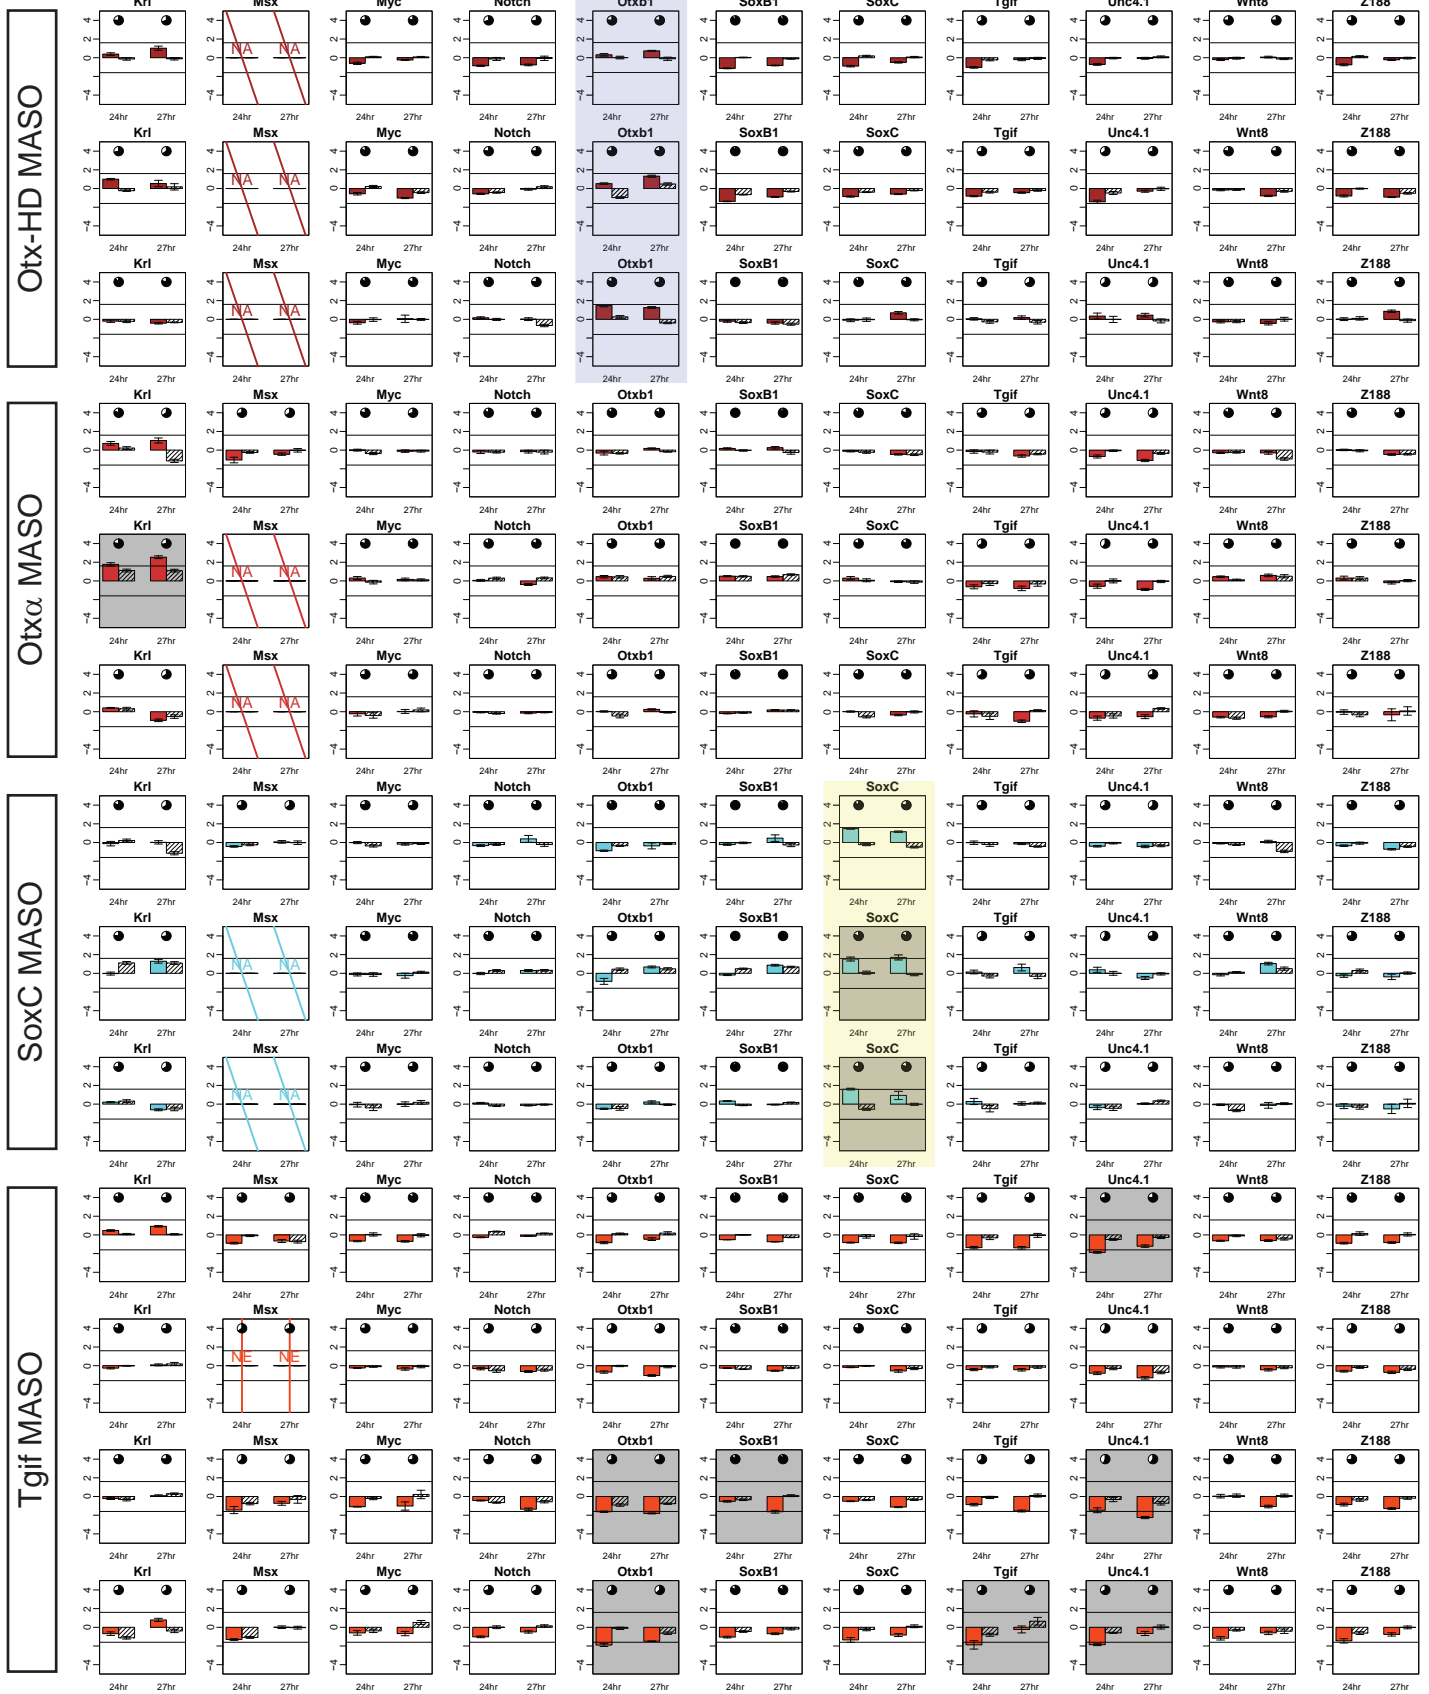

**Supplementary Figure 5. Complete gene expression perturbation data.** Changes in gene expression levels were measured by QPCR and plotted as ddCT (in cycle number), the difference between normalized gene expression levels (compared to *ubiquitin*, see Methods) in embryos treated with morpholino (MASO) and levels in uninjected embryos, at 24 and 27h post fertilization. A similar data set for 18h embryos was reported earlier<sup>14</sup>. The data presentation in this computational platform is as in ref<sup>12</sup>. The gene specific MASO used for each series of repeats is given in the row headings at left. Each repeat was carried out using a separate batch of embryos, which were injected immediately after fertilization with gene-specific MASO or control MASO or left untreated and cultured for 24 or 27h. Within the individual data sets response of embryos to a control MASO is shown by gray rectangles and the response to the gene specific MASO by colored boxes. Colors used are changed for each gene specific MASO series for ease of visualization. Each data point reflects the average of three technical replicates. Error bars are standard errors. Grey plot backgrounds indicate ddCTs for embryos injected with gene specific MASO of  $>1.6$  (increased expression levels compared to uninjected embryos) or  $< -1.6$  (decreased expression levels). Thick plot border indicates ddCTs  $>1.6$  or  $< -1.6$  for embryos injected with control MASO. Each time point has a pie plot, which indicates the average CT in the control MASO injection. Full pie means average CT is 20, blank pie means average CT is 40 (i.e. not expressed). In general, average CTs of  $>30$  (half blank pie) are not reliable. Changes in gene expression levels of  $>1.6$  cycles (3-fold) were considered significant if expression levels of target genes decreased, indicating an activating input from the perturbed gene. If target gene expression levels increased upon perturbation, changes of  $>1$  cycle (2-fold) were considered significant, since the underlying repression mechanism might occur in an embryonic domain different from the target gene expression domain and the resulting expansion of target gene expression might not exceed a 2- fold change in overall expression levels. Each perturbation was analyzed in at least three independent experiments, as shown. Genes showing significant changes of expression levels upon a given perturbation in the majority (i.e.  $>50\%$ ) of experiments were considered as potential target genes. Data points highlighted in yellow reflect potential direct interactions, and these are listed in Supplementary Table 1. Data points highlighted in orange show significant changes in expression levels but are not considered as direct interactions for the individual reasons given in Supplementary Table 2. Data points were highlighted in blue where genes were not significantly affected by the perturbation of a given gene, even though other evidence (e.g., experimental *cis*-regulatory evidence) indicates a direct regulatory interaction. Data points highlighted in green reflect the result of predicted signaling interactions. The relevant signaling interactions are listed in Supplementary Table 3.

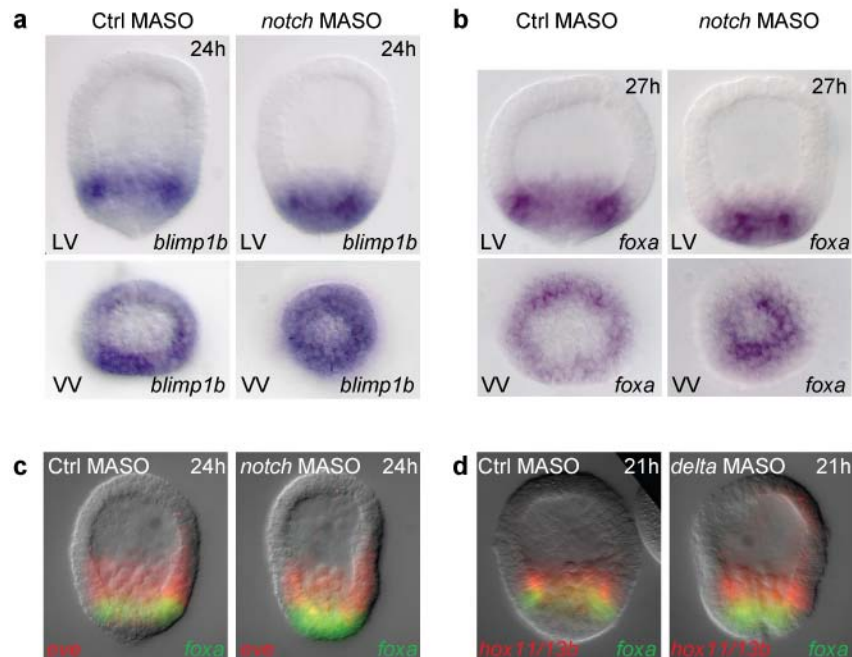

**Supplementary Figure 6. Repression of *veg2* but not *veg1* endodermal regulatory genes downstream of Delta/Notch signaling.** The expression of *blimp1b* (a) and *foxa* (b) is detected in the *veg2* endodermal precursor cells in embryos injected with control morpholino (Ctrl MASO), but expands inward to cells which usually give rise to mesodermal cell types in embryos injected with *notch* morpholino (MASO). On the other hand, the same perturbation does not affect *veg1* endodermal regulatory gene expression, as shown in (c) and (d): (c) *eve* expression is detected in cells peripheral to *foxa* expressing cells in control morpholino and in *notch* morpholino injected embryos. (d) expression of *hox11/13b* in control morpholino and *delta* morpholino injected embryos is detected outside of the *foxa* expression domain. In both, (c) and (d), the perturbation affects *foxa* expression, which expands towards the vegetal pole.

**a** Number of GFP transcripts/embryo:

|                             | 7.5 hpf | 9 hpf | 10.5 hpf | 12 hpf | 15 hpf | 19 hpf | 24 hpf |
|-----------------------------|---------|-------|----------|--------|--------|--------|--------|
| <b>Wnt8-GFP.BAC</b>         | 15909   | 14487 | 11615    | 15486  | 17038  | 6218   | 8044   |
| <b>Wnt8-GFP.BACdelBlimp</b> | 6960    | 15008 | 21535    | 14491  | 18913  | 7856   | 6846   |

## Number of BAC copies/embryo:

|                             | 7.5 hpf | 9 hpf | 10.5 hpf | 12 hpf | 15 hpf | 19 hpf | 24 hpf |
|-----------------------------|---------|-------|----------|--------|--------|--------|--------|
| <b>Wnt8-GFP.BAC</b>         | 24.44   | 15.07 | 13.73    | 15.47  | 14.90  | 8.81   | 7.83   |
| <b>Wnt8-GFP.BACdelBlimp</b> | 11.19   | 12.02 | 11.95    | 15.20  | 11.81  | 4.99   | 5.14   |

## Number of GFP transcripts/BAC

|                             | 7.5 hpf | 9 hpf | 10.5 hpf | 12 hpf | 15 hpf | 19 hpf | 24 hpf |
|-----------------------------|---------|-------|----------|--------|--------|--------|--------|
| <b>Wnt8-GFP.BAC</b>         | 651     | 961   | 846      | 1001   | 1144   | 706    | 1027   |
| <b>Wnt8-GFP.BACdelBlimp</b> | 622     | 1248  | 1803     | 953    | 1601   | 1576   | 1333   |

**b**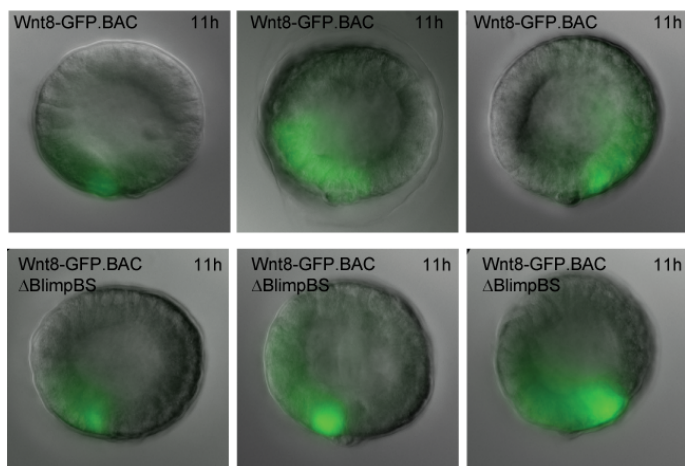

**Supplementary Figure 7. Expression of Wnt8:GFP-BAC does not require activation by Blimp1.** A recent model from this laboratory proposed that the expression of *wnt8*, a crucial input into the endoderm GRN, requires transcriptional activation by Blimp1<sup>5,9,15</sup>. In turn, expression of *blimp1b* is activated by Tcf/ $\beta$ -catenin in cells receiving Wnt signaling and repressed by its own gene product Blimp1<sup>5,10</sup>. This circuitry was proposed to result in a moving torus expression of *blimp1b*, *wnt8* and presumably other Tcf dependent regulatory genes: gene expression would be activated in a ring of cells due to Tcf/ $\beta$ -catenin accumulation in cells receiving Wnt signaling and would be turned off due to the auto-repression of Blimp1, which would lead to absence of Blimp1-driven *wnt8* expression. The evidence supporting the requirement of Blimp1 for *wnt8* expression derived from *cis*-regulatory analyses of *wnt8*. The non-conserved Module C located 2.9 kb upstream of exon 1 required for its activity binding sites for both Tcf and Blimp1<sup>9</sup>. Here we tested whether the previously identified Blimp1 binding sites are required for expression of a recombinant Wnt8-GFP BAC (Sp\_wnt8\_BAC, 041A08, 78 kb; for sequence see [http://www.spbase.org/SpBase/resources/bac\\_sequences.php](http://www.spbase.org/SpBase/resources/bac_sequences.php)). The Blimp1 binding site was deleted in Wnt8-GFP.BACdelBlimp (original sequence: TACAAAGTTCCCTTTCAC; after deletion: TACAAAGAC). Injection of Wnt8-

GFP.BACdelBlimp resulted in similar quantitative (**a**) and spatial (**b**) expression of GFP like the control Wnt8-GFP.BAC. These Blimp1 binding sites are therefore not required to activate *wnt8* expression.

>SP\_Dachshund\_partial\_cDNA

```
ATGGGAAGCCCACCGCCTACTCAGGTTCCCCTGAGCAGTGTTCTGTACAAGCTGGATCGGGGTAGCCTACA  
GTACCCACCGCCTGTCAGCAACGACCCCGCTAACAACGAGTGCAAACCTCATCGAATATCGAGGGGCAAA  
AATTGCCAGTTTCAACATTAATGGAGATTGTATGATATGCTTGCCACAAGCTTTTGAATTGTTTCTGAAA  
CATCTTGTGGGCGGACTACACACGGTTTACACAAAACCTGAAGAGACTGAGCATCACTCCGGTGGTTTGT  
ACGTAGAACAGGTTTCGCATCCTGCGGGGACTTGGGGCGATCCAGCCGGGAGTCAACCGCTGTAAACTGCT  
CACCAGGAAACAGTTTGTATTTCTCTACGAAGATTGCACCACTGCTAGTCGACCAGGTAGACCTCCGAAA  
CGAAACATTCTCTCTCACTCACACCAACCATCCATGGACTCTCACGTATGGGACCCACCCTCGACCTCC  
TCAAAGGCCCAAACCTGGAAAATGGTCACCACCGTCTGCCGTTCAATGGATACGAGCACTTGGCTGCAGC  
CTCCCCGTACCTCCTGGCCACCCACCCAGCATTCTCCATCCTCCTCTCCATGCCGACCAACCATCTC  
ACCGCATACCCGCTAAGGCTGCCGAGATGCACCACCTTACCATGCCGACCTGGGCGCCGCCACCTTC  
ACAACCTGCACAAGCTCTCCGTAGGCATCCCCAGATCGTCGAGCCAGCCAGCTCTCACAGCCACGCATC  
GGTCGACATCGACGACCACGAGGAAGACCT
```

GLEAN3\_28061 bp 1-398

GLEAN3\_18581 bp 43-384

GLEAN3\_18581 bp 429-491

**Supplementary Figure 8. Partial cDNA sequence of dachshund mapping to two different GLEAN3 gene models.** Sequences for GLEAN models to be found on SpBase (<http://www.spbase.org>)
